# Supplementary material for: Reactivity of a quasi-four-coordinate butylmagnesium cation
Source: Royal Society of Chemistry journal article supplement (doi:10.1039/d3dt00018d), 2023-01-01
Supplement: d3dt00018d1.pdf [file d3dt00018d1.pdf]

## Supporting Information

For

### **Reactivity of a quasi-four-coordinate butylmagnesium cation**

*Ankur, Deepti Sharma, Alex P. Andrews and Ajay Venugopal\**

School of Chemistry, Indian Institute of Science Education and Research Thiruvananthapuram,  
Vithura, Thiruvananthapuram 695551, India.

E-mail: [venugopal@iisertvm.ac.in](mailto:venugopal@iisertvm.ac.in)

## Table of Content

1. Experimental Methods
2. Synthetic Procedure and Characterization
3. Crystallographic Data
4. Computational Details
5. References

## 1. Experimental Methods

All reactions were performed under an argon atmosphere by using standard Schlenk technique or in a glove box under an atmosphere of argon. Glassware was dried at 200 °C prior to use. Solvents were dried, distilled and degassed by using standard methods.<sup>1</sup>  $[\text{HNEt}_3][\text{B}\{\text{C}_6\text{H}_3(\text{CF}_3)_2\}_4]$  was synthesized according the reported literature procedure.<sup>2</sup> PMDTA and  $\text{PhSiH}_3$  were purchased from TCI chemicals and distilled before use. HBpin was purchased from Sigma-Aldrich and was used as such. The gasses were passed through a column of molecular sieves dried overnight under vacuum at 200 °C.  $^1\text{H}$ ,  $^{13}\text{C}$ ,  $^{11}\text{B}$ , and  $^{19}\text{F}$  NMR spectra were recorded on a Bruker Avance 500 MHz spectrometer. Chemical shifts ( $\delta$  in ppm) in the  $^1\text{H}$  and  $^{13}\text{C}$  NMR spectra were referenced to the residual signals of the deuterated solvents.  $^{11}\text{B}$  NMR spectra were referenced to  $\text{NaBH}_4$  signal in  $\text{D}_2\text{O}$ .  $^{19}\text{F}$  spectra were referenced to  $\text{CFCl}_3$  signal. Abbreviations for NMR spectra: s (singlet), d (doublet), t (triplet), q (quartet), quin (quintuplet), sext (sextet), sep (septet), br (broad), m (multiplet). Elemental analyses were performed on an *Elemental Vario Micro Cube* machine. GC-Agilent 7890B series (Mass detector G7077B series, EI-70 eV, quadrupole ion detector) with silica capillary column (9091S-433UI, HP-5MSUI, with 30 m x 0.25 mm dimension) was used for mass analysis.

## 2. Synthetic Procedure and Characterization

### Synthesis of Compound 1a

PMDTA (0.066 mL, 0.311 mmol) was added to  $[\text{NEt}_3\text{H}][\text{B}\{\text{C}_6\text{H}_3(\text{CF}_3)_2\}_4]$  (0.300 g, 0.311 mmol) in 3 mL of dry  $\text{Et}_2\text{O}$  inside the glove box which formed a clear colorless solution. To the solution  $n\text{-Bu}_2\text{Mg}$  (0.31 mL, 1M in heptane, 0.310 mmol) was added slowly.  $[(\text{pmdta})\text{Mg-}n\text{-Bu}][\text{B}\{\text{C}_6\text{H}_3(\text{CF}_3)_2\}_4]$  was precipitated by adding 1 mL pentane in the reaction mixture and keeping the reaction mixture at -30 °C in glove box for 1 hour. (Yield: 0.302 g, 87 %).

Elemental analysis for  $\text{C}_{45}\text{H}_{44}\text{N}_3\text{BF}_{24}\text{Mg}$ : C, 48.35; H, 3.97; N, 3.76. Found: C, 48.29; H, 3.95; N, 3.79

**$^1\text{H}$  NMR [500 MHz, 300K, THF(D8)]:**  $\delta$  - 0.59 (sext, 2H,  $^3J_{\text{HH}} = 4.7$  Hz,  $\text{Mg-CH}_2\text{-CH}_2\text{CH}_2\text{CH}_3$ ), 0.85 (t, 3H,  $^3J_{\text{HH}} = 7.34$  Hz,  $\text{Mg-(CH}_2)_3\text{CH}_3$ ), 1.27 (sext, 2H,  $^3J_{\text{HH}} = 7.20$  Hz,  $\text{Mg-(CH}_2)_2\text{CH}_2\text{CH}_3$ ), 1.48 (quin, 2H,  $^3J_{\text{HH}} = 7.79$  Hz,  $\text{Mg-CH}_2\text{-CH}_2\text{-CH}_2\text{CH}_3$ ), 2.42 (s, 15H,  $\text{pmdta (Me)N(CH}_2\text{CH}_2\text{NMe}_2)_2$ ), 2.65 (s, 4H,  $\text{pmdta (Me)N(CH}_2\text{CH}_2\text{NMe}_2)_2$ ), 2.86 (s, 4H,  $\text{pmdta (Me)N(CH}_2\text{CH}_2\text{NMe}_2)_2$ ), 7.57 (s, 4H, *p-CH*), 7.78 (s, 8H, *o-CH*)

**$^{13}\text{C}\{^1\text{H}\}$  NMR [125.74 MHz, 300K, THF(D8)]:** 9.2 ( $\text{Mg-CH}_2\text{-CH}_2\text{CH}_2\text{CH}_3$ ), 14.1 ( $\text{Mg-(CH}_2)_3\text{CH}_3$ ), 33.2 ( $\text{Mg-(CH}_2)_2\text{CH}_2\text{CH}_3$ ), 34.6 ( $\text{CH}_2\text{-CH}_2\text{-CH}_2\text{CH}_3$ ), 46.2 ( $\text{pmdta (Me)N(CH}_2\text{CH}_2\text{NMe}_2)_2$ ), 55.9 ( $\text{pmdta (Me)N(CH}_2\text{CH}_2\text{NMe}_2)_2$ ), 58.4 ( $\text{pmdta (Me)N(CH}_2\text{CH}_2\text{NMe}_2)_2$ ), 118.2 (b sept,  $^3J_{\text{CF}} = 3.87$  Hz, *p-C*), 125.5 (q,  $^1J_{\text{CF}} = 271.64$  Hz,  $\text{CF}_3$ ), 130.0 [qq, ( $^3J_{\text{CB}} = 3.05$  Hz,  $^2J_{\text{CF}} = 31.57$  Hz) *m-C*], 135.6 (*o-C*), 162.8 (q,  $^1J_{\text{BC}} = 49.65$  Hz, *ipso-C*)

**$^{11}\text{B}$  [160 MHz, 300K, THF(D8)]:**  $\delta$  -6.50 (s,  $\text{B}\{\text{C}_6\text{H}_3(\text{CF}_3)_2\}_4$ )

$^{19}\text{F}$  [470.58 MHz, 300K, THF(D8)]:  $\delta$  -63.3 (s,  $\text{CF}_3$ )

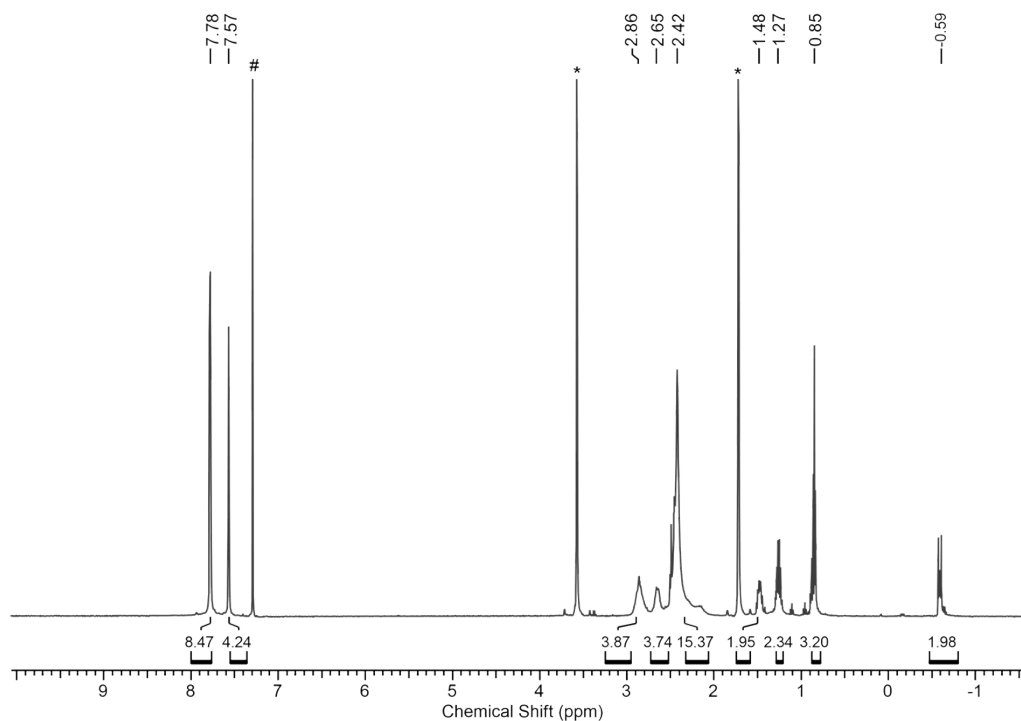

Figure S1:  $^1\text{H}$  NMR spectrum of compound 1a in THF(D8). \* THF(D8) peaks, #  $\text{C}_6\text{H}_6$  impurity in THF(D8).

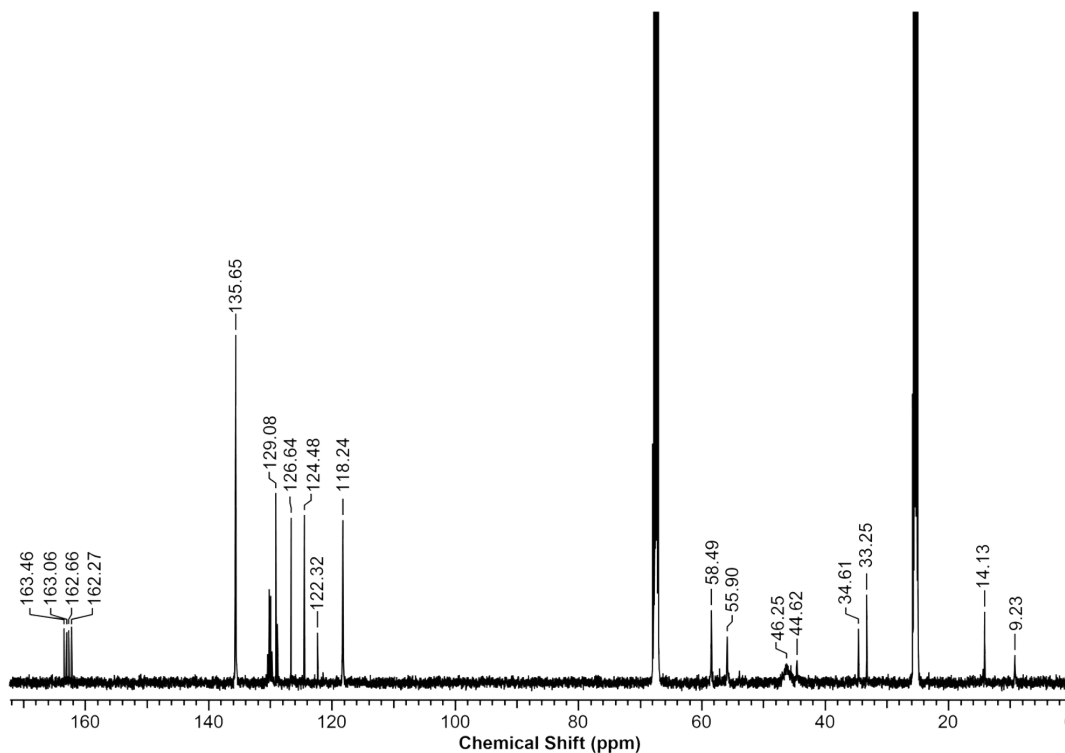

Figure S2:  $^{13}\text{C}\{^1\text{H}\}$  NMR of compound 1a in THF(D8).

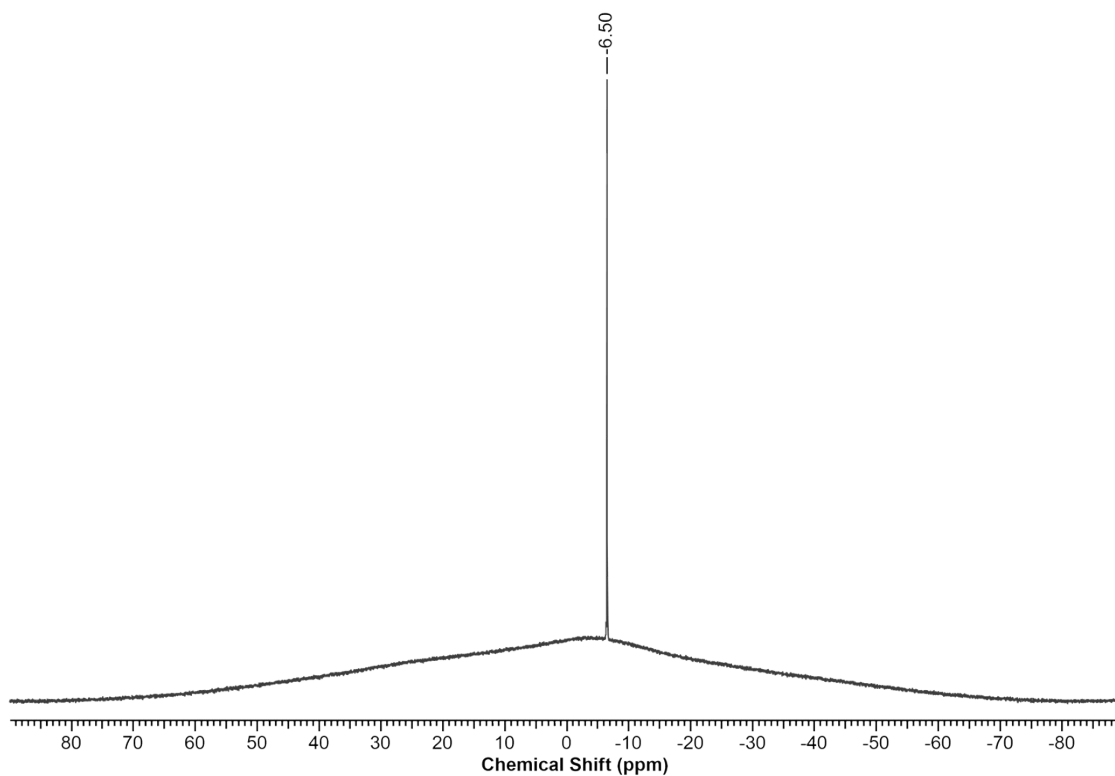

**Figure S3:  $^{11}\text{B}$  NMR spectrum of compound 1a in THF(D8).**

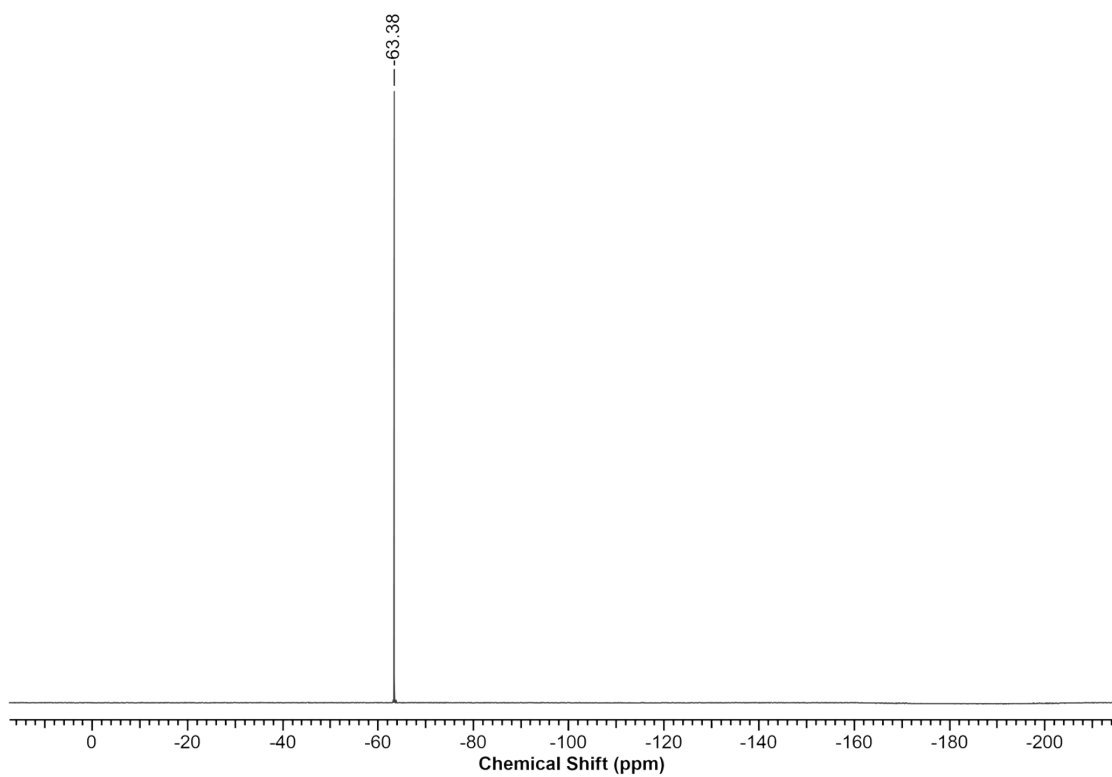

**Figure S4:  $^{19}\text{F}$  NMR spectrum of compound 1a in THF(D8).**

## **Synthesis of Compound 1b**

PMDTA (0.080 mL, 0.384 mmol) was added to  $[\text{NEt}_3\text{H}][\text{B}(\text{C}_6\text{F}_5)_4]$  (0.300 g, 0.384 mmol) in 3 mL of dry  $\text{Et}_2\text{O}$  inside the glove box which formed a clear colorless solution. To the solution  $n\text{-Bu}_2\text{Mg}$  (0.39 mL, 1M in heptane, 0.390 mmol) was added slowly. Colorless crystals of  $[(\text{pmdta})\text{Mg-}n\text{-Bu}][\text{B}\{\text{C}_6\text{H}_3(\text{CF}_3)_2\}_4]$  were obtained after layering the solution with 1 mL pentane at  $-25\text{ }^\circ\text{C}$  after 24 hours. (Yield: 0.272 g, 76 %)

Elemental analysis for  $\text{C}_{37}\text{H}_{32}\text{N}_3\text{BF}_{20}\text{Mg}$ : C, 47.59; H, 3.45; N, 4.50. Found: C, 47.61; H, 3.42; N, 4.47;

**$^1\text{H}$  NMR [500 MHz, 300K, THF(D8)]:**  $\delta$  -0.59 (sext, 2H,  $^3J_{\text{HH}} = 4.78$  Hz, Mg- $\text{CH}_2\text{-CH}_2\text{CH}_2\text{CH}_3$ ), 0.85 (t, 3H,  $^3J_{\text{HH}} = 7.32$  Hz, Mg- $(\text{CH}_2)_3\text{CH}_3$ ), 1.25 (sext, 2H,  $^3J_{\text{HH}} = 7.24$  Hz, Mg- $(\text{CH}_2)_2\text{CH}_2\text{CH}_3$ ), 1.48 (quin, 2H,  $^3J_{\text{HH}} = 7.80$ , Mg- $\text{CH}_2\text{-CH}_2\text{-CH}_2\text{CH}_3$ ), 2.42 (s, 15H, pmdta (Me)N( $\text{CH}_2\text{CH}_2\text{NMe}_2$ ) $_2$ ), 2.65 (s, 4H, pmdta (Me)N( $\text{CH}_2\text{CH}_2\text{NMe}_2$ ) $_2$ ), 2.86 (s, 4H, pmdta (Me)N( $\text{CH}_2\text{CH}_2\text{NMe}_2$ ) $_2$ )

**$^{13}\text{C}\{^1\text{H}\}$  NMR [125.74 MHz, 300K, THF(D8)]:**  $\delta$  9.2 (Mg- $\text{CH}_2\text{-CH}_2\text{CH}_2\text{CH}_3$ ), 14.1 (Mg- $(\text{CH}_2)_3\text{CH}_3$ ), 33.2 (Mg- $(\text{CH}_2)_2\text{CH}_2\text{CH}_3$ ), 34.6 ( $\text{CH}_2\text{-CH}_2\text{-CH}_2\text{CH}_3$ ), 46.1 (pmdta (Me)N( $\text{CH}_2\text{CH}_2\text{NMe}_2$ ) $_2$ ), 55.9 (pmdta (Me)N( $\text{CH}_2\text{CH}_2\text{NMe}_2$ ) $_2$ ), 58.5 (pmdta (Me)N( $\text{CH}_2\text{CH}_2\text{NMe}_2$ ) $_2$ ), 136.0 (ipso-C), 138.1 (p-CF), 148.2 (m-CF), 150.1 (o-CF)

**$^{11}\text{B}$  [160 MHz, 300K, THF(D8)]:**  $\delta$  -16.5 (s,  $\text{B}(\text{C}_6\text{F}_5)_4$ )

**$^{19}\text{F}$  [470.58 MHz, 300K, THF(D8)]:**  $\delta$  -132.7 (d,  $^3J_{\text{FF}} = 9.1$  Hz, o-CF), -164.94 (t,  $^3J_{\text{FF}} = 20.5$  Hz, p-CF), -168.44 (t,  $^3J_{\text{FF}} = 17.3$  Hz, m-CF).

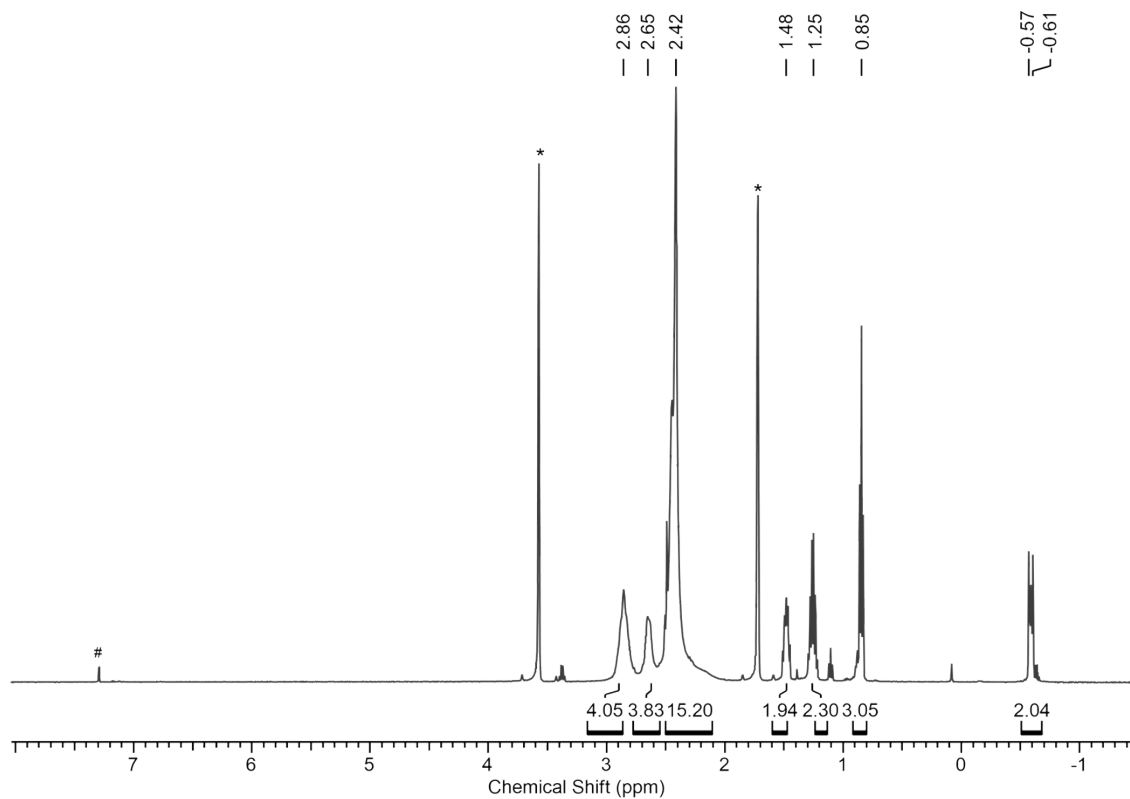

**Figure S5:**  $^1\text{H}$  NMR spectrum of compound **1b** in THF(D8). \* THF(D8) peaks, # C<sub>6</sub>H<sub>6</sub> impurity in THF(D8).

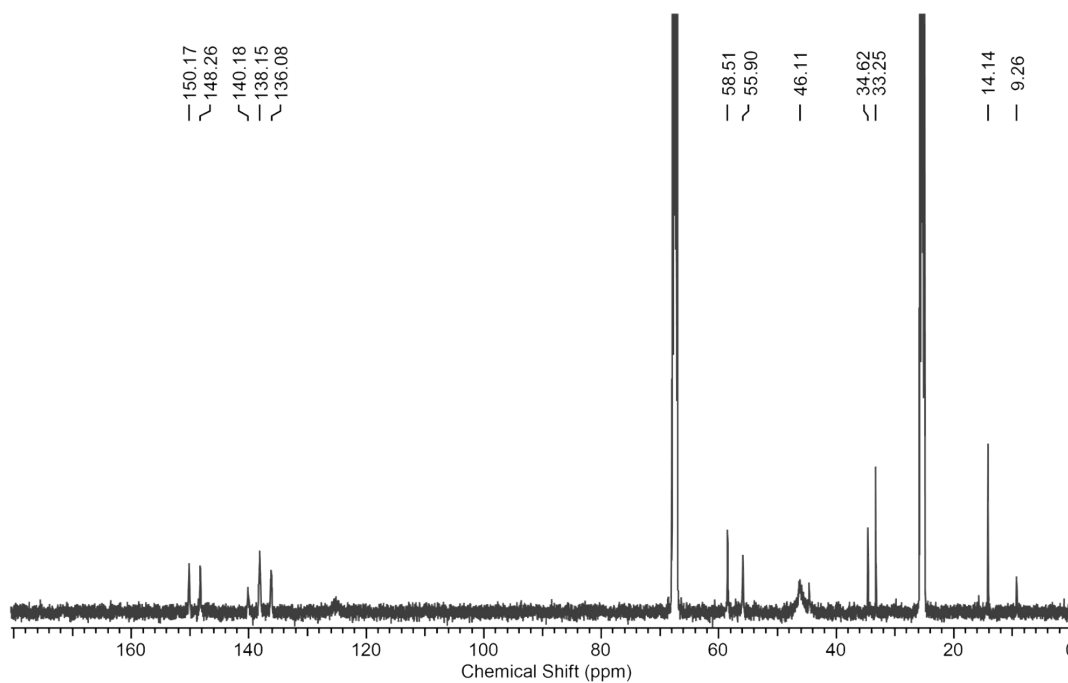

**Figure S6:**  $^{13}\text{C}\{^1\text{H}\}$  NMR of compound **1b** in THF(D8).

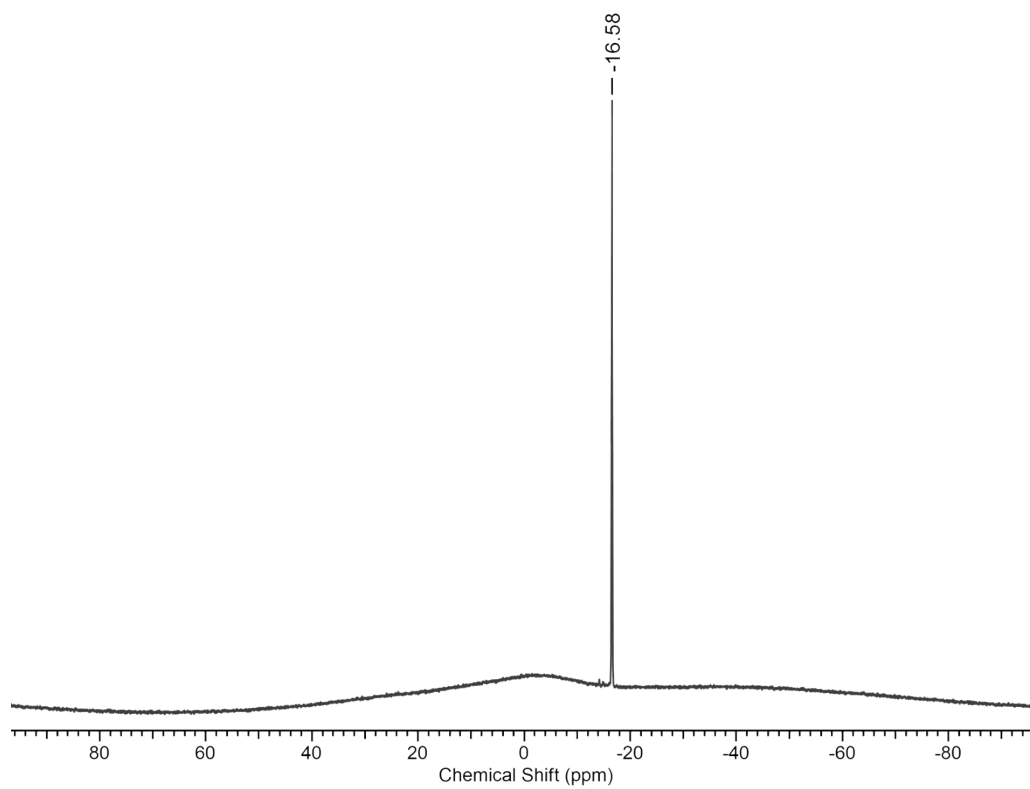

Figure S7:  $^{11}\text{B}$  NMR spectrum of compound 1b in THF(D8).

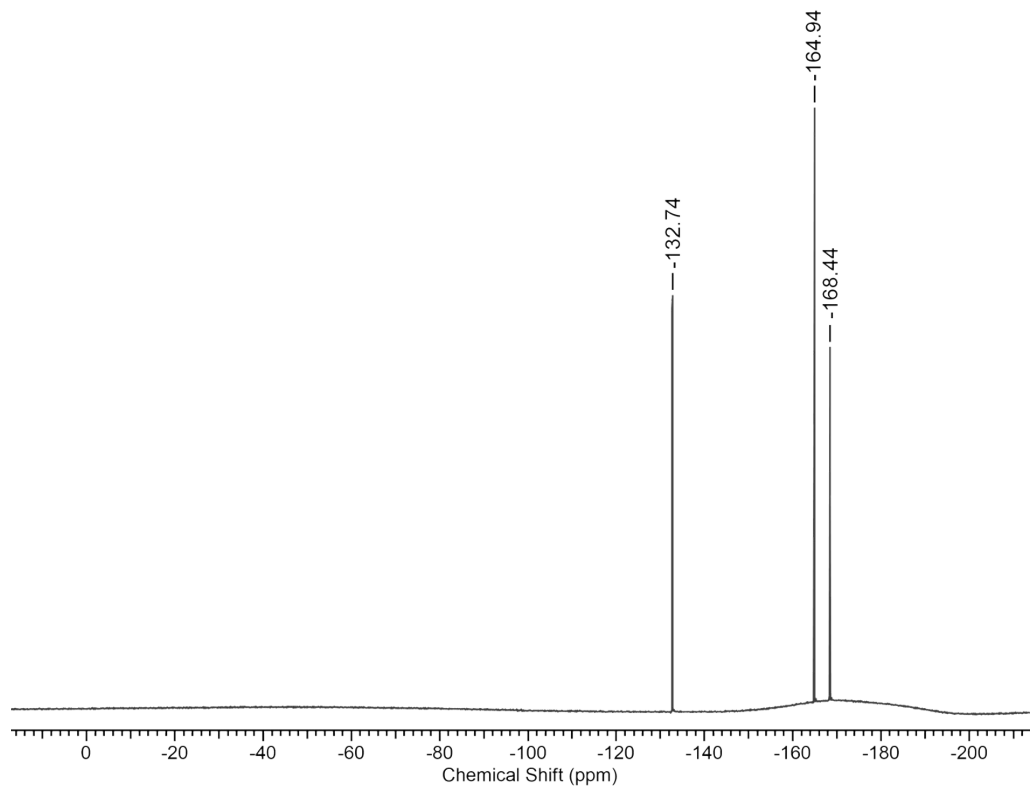

Figure S8:  $^{19}\text{F}$  NMR spectrum of compound 1b in THF(D8).



### NMR reaction of 1a with benzophenone in C<sub>6</sub>D<sub>5</sub>Br

Crystals of **1a** [(pmdta)Mg-*n*-Bu][B{C<sub>6</sub>H<sub>3</sub>(CF<sub>3</sub>)<sub>2</sub>]<sub>4</sub>] (0.01 g, 0.009 mmol) and 1 equivalent of Ph<sub>2</sub>CO (0.0016 g, 0.009 mmol) was added in a J Young NMR tube inside the glove box. 0.5 mL of dry C<sub>6</sub>D<sub>5</sub>Br was added to the NMR tube and proton NMR was recorded immediately in less than five minutes.

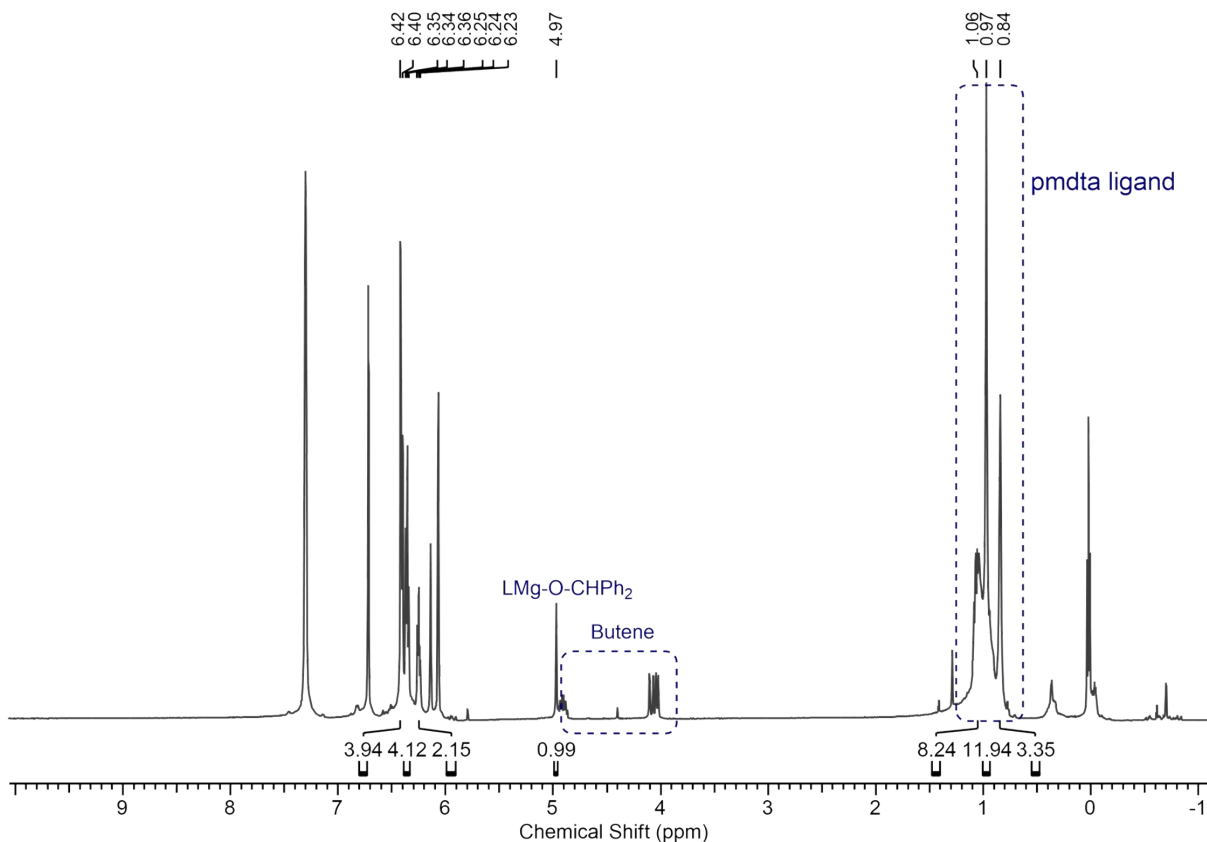

**Figure S9: <sup>1</sup>H NMR spectrum of reaction between compound 1a and benzophenone in C<sub>6</sub>D<sub>5</sub>Br.**

### Synthesis of Compound 2a

Crystals of **1a** [(pmdta)Mg-*n*-Bu][B{C<sub>6</sub>H<sub>3</sub>(CF<sub>3</sub>)<sub>2</sub>]<sub>4</sub>] (0.100 g, 0.089 mmol) and benzophenone (0.089 mmol, 0.016 g) was added to a vial in glove box and to the solid mixture 5 mL toluene was added. The reaction mixture was stirred for 30 minutes and toluene was removed under vacuum. Dry 5 mL Et<sub>2</sub>O was added to the residual solid and layered with 2 mL of pentane. Colourless crystals of **2a** were obtained after 24 hours at room temperature. (Due to the presence of 0.79 equivalent Et<sub>2</sub>O bound to Mg centre of the vacuum dried **2a**, the <sup>1</sup>H NMR spectrum exhibits two sets of peaks for protons) (Yield: 0.079 g, 71 %).

Elemental analysis for C<sub>54</sub>H<sub>54</sub>N<sub>3</sub>BOF<sub>24</sub>Mg. 0.79(CH<sub>2</sub>CH<sub>3</sub>)<sub>2</sub>O: C, 52.70; H, 4.18; N, 3.22. Found: C, 52.65; H, 4.24; N, 3.23;

**$^1\text{H}$  NMR [500 MHz, 300K, THF(D8)]:**  $\delta$  1.11 (t, 6H,  $^3J_{\text{HH}} = 7.03$  Hz,  $(\text{CH}_3\text{CH}_2)_2\text{O}$ ), 2.34 (s, 3H, pmdta  $(\text{Me})\text{N}(\text{CH}_2\text{CH}_2\text{NMe}_2)_2$ ), 2.41 (s, 12H, pmdta  $(\text{Me})\text{N}(\text{CH}_2\text{CH}_2\text{NMe}_2)_2$ ), 2.60 (d, 2H,  $^3J_{\text{HH}} = 3.6$  Hz, pmdta  $(\text{Me})\text{N}(\text{CH}_2\text{CH}_2\text{NMe}_2)(\text{CH}_2\text{CH}_2\text{NMe}_2)$ ), 2.68 (m, 2H, pmdta  $(\text{Me})\text{N}(\text{CH}_2\text{CH}_2\text{NMe}_2)(\text{CH}_2\text{CH}_2\text{NMe}_2)$ ), 2.79 (m, 2H, pmdta  $(\text{Me})\text{N}(\text{CH}_2\text{CH}_2\text{NMe}_2)(\text{CH}_2\text{CH}_2\text{NMe}_2)$ ), 2.86 (m, 2H, pmdta  $(\text{Me})\text{N}(\text{CH}_2\text{CH}_2\text{NMe}_2)(\text{CH}_2\text{CH}_2\text{NMe}_2)$ ), 3.38 (q, 4H,  $^3J_{\text{HH}} = 6.9$  Hz,  $(\text{CH}_3\text{CH}_2)_2\text{O}$ ), 5.88 (s,  $\text{MgOCHPh}_2$ ) 7.13 (t, 4H,  $^3J_{\text{HH}} = 6.9$  Hz,  $m\text{-CH}(\text{Mg-OC}(\text{H})\text{Ph}_2)$ ), 7.36 (b, 4H,  $o\text{-CH}(\text{Mg-OC}(\text{H})\text{Ph}_2)$ ) 7.65 (b, 2H,  $p\text{-CH}(\text{Mg-OC}(\text{H})\text{Ph}_2)$ ), 7.58 (s, 4H,  $p\text{-CH}(\text{B}\{\text{C}_6\text{H}_3(\text{CF}_3)_2\}_4)$ ), 7.79 (s, 8H,  $o\text{-CH}(\text{B}\{\text{C}_6\text{H}_3(\text{CF}_3)_2\}_4)$ )

**$^{13}\text{C}\{^1\text{H}\}$  NMR [125.74 MHz, 300K, THF(D8)]:**  $\delta$  15.7 ( $(\text{CH}_3\text{CH}_2)_2\text{O}$ ), 43.7 (pmdta  $(\text{Me})\text{N}(\text{CH}_2\text{CH}_2\text{NMe}_2)_2$ ), 45.2 (pmdta  $(\text{Me})\text{N}(\text{CH}_2\text{CH}_2\text{NMe}_2)_2$ ), 53.9 (pmdta  $(\text{Me})\text{N}(\text{CH}_2\text{CH}_2\text{NMe}_2)(\text{CH}_2\text{CH}_2\text{NMe}_2)$ ), 55.6 (pmdta  $(\text{Me})\text{N}(\text{CH}_2\text{CH}_2\text{NMe}_2)(\text{CH}_2\text{CH}_2\text{NMe}_2)$ ), 57.1 (pmdta  $(\text{Me})\text{N}(\text{CH}_2\text{CH}_2\text{NMe}_2)(\text{CH}_2\text{CH}_2\text{NMe}_2)$ ), 58.2 (pmdta  $(\text{Me})\text{N}(\text{CH}_2\text{CH}_2\text{NMe}_2)(\text{CH}_2\text{CH}_2\text{NMe}_2)$ ), 66.3 ( $(\text{CH}_3\text{CH}_2)_2\text{O}$ ), 80.1 ( $\text{MgOCHPh}_2$ ), 122.3 ( $m\text{-CH}(\text{Mg-OC}(\text{H})\text{Ph}_2)$ ), 128.8, ( $o\text{-CH}(\text{Mg-OC}(\text{H})\text{Ph}_2)$ ), 130.2, ( $p\text{-CH}(\text{Mg-OC}(\text{H})\text{Ph}_2)$ ), 118.2 (b sept,  $^3J_{\text{CF}} = 3.8$  Hz,  $p\text{-CH}(\text{B}\{\text{C}_6\text{H}_3(\text{CF}_3)_2\}_4)$ ), 125.5 (q,  $^1J_{\text{CF}} = 271.6$  Hz,  $\text{CF}_3\text{-}(\text{B}\{\text{C}_6\text{H}_3(\text{CF}_3)_2\}_4)$ ), 130.0 [qq, ( $^3J_{\text{CB}} = 3.05$  Hz,  $^2J_{\text{CF}} = 31.5$  Hz)  $m\text{-C}(\text{B}\{\text{C}_6\text{H}_3(\text{CF}_3)_2\}_4)$ ], 135.6 ( $o\text{-C}(\text{B}\{\text{C}_6\text{H}_3(\text{CF}_3)_2\}_4)$ ), 162.8 (q,  $^1J_{\text{BC}} = 49.6$  Hz,  $ipso\text{-C}(\text{B}\{\text{C}_6\text{H}_3(\text{CF}_3)_2\}_4)$ )

**$^{11}\text{B}$  [160 MHz, 300K, THF(D8)]:**  $\delta$  - 6.52 ppm (s,  $\text{B}\{\text{C}_6\text{H}_3(\text{CF}_3)_2\}_4$ )

**$^{19}\text{F}$  [470.58 MHz, 300K, THF(D8)]:**  $\delta$  -63.38 (s,  $\text{CF}_3$ )

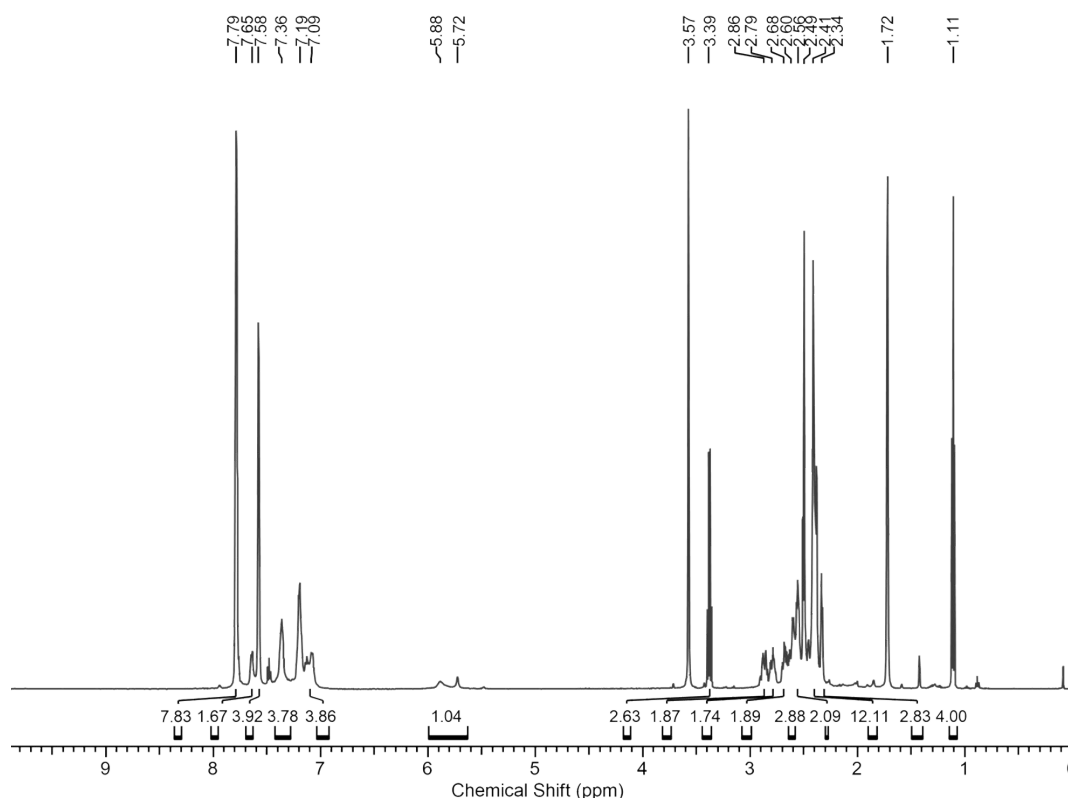

Figure S10:  $^1\text{H}$  NMR spectrum of compound 2a in THF(D8).

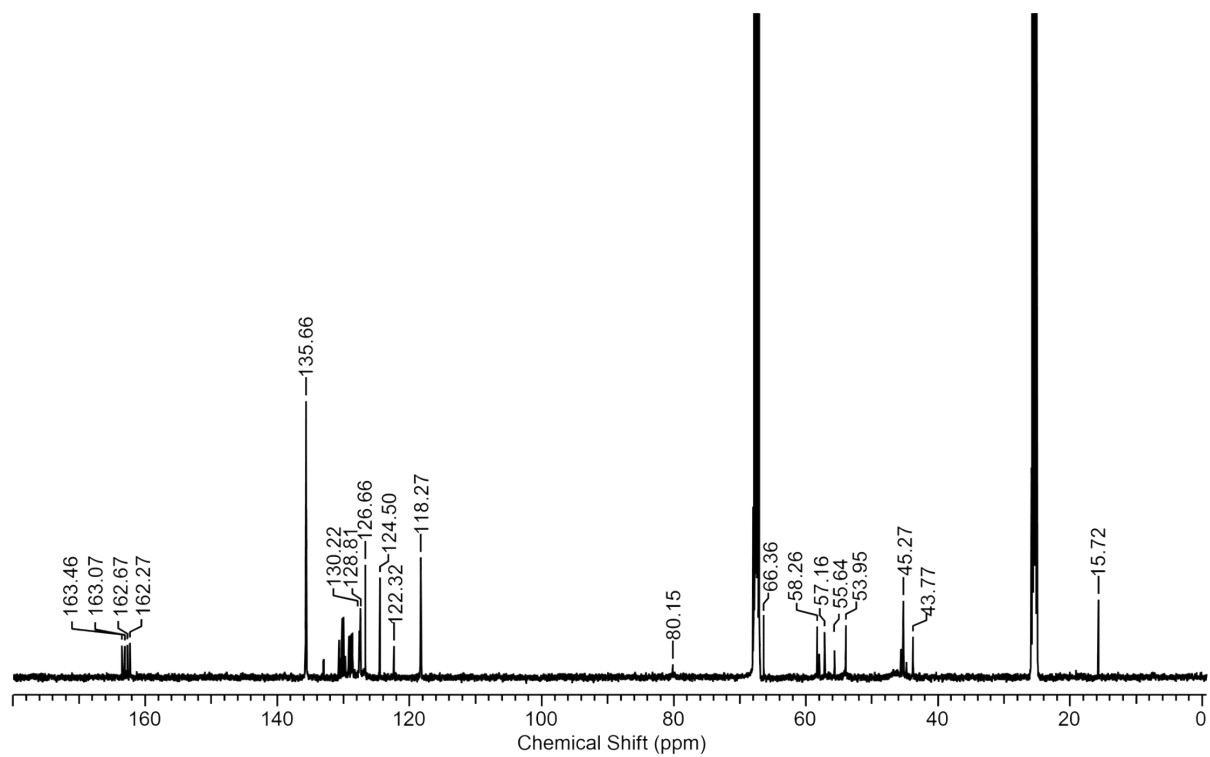

Figure S11:  $^{13}\text{C}\{^1\text{H}\}$  NMR of compound 2a in THF(D<sub>8</sub>).

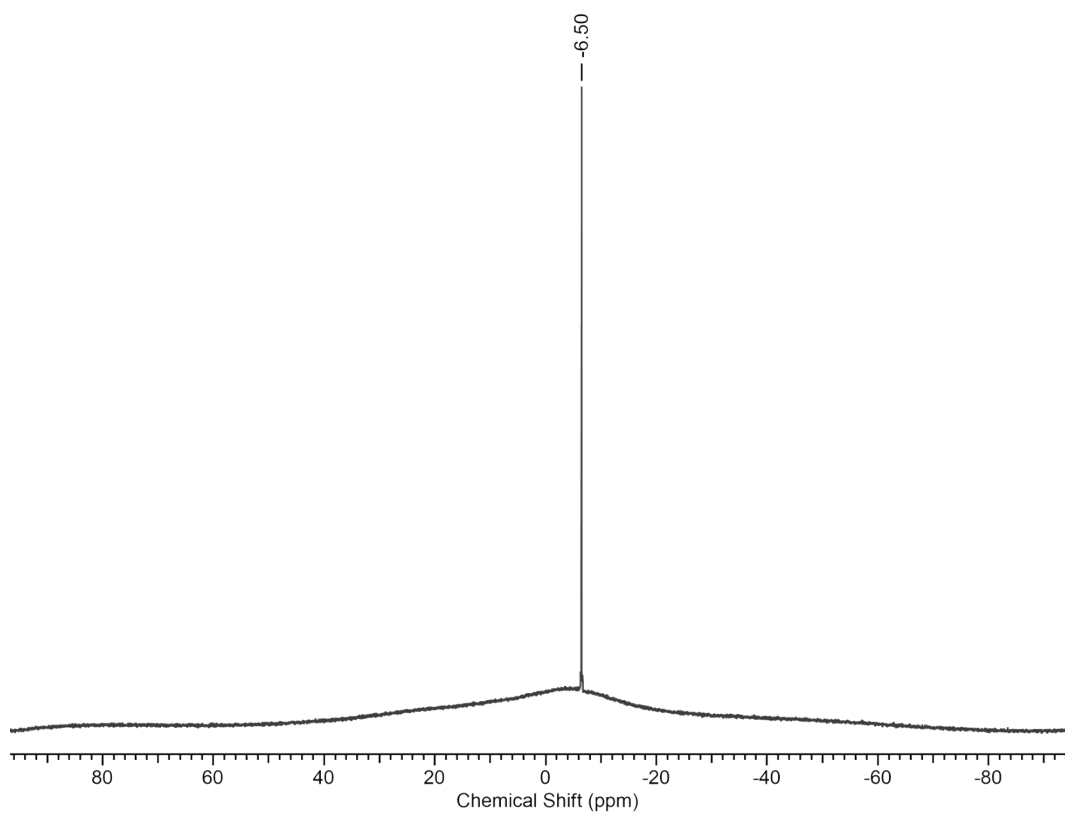

Figure S12:  $^{11}\text{B}$  NMR spectrum of compound 2a in THF(D<sub>8</sub>).

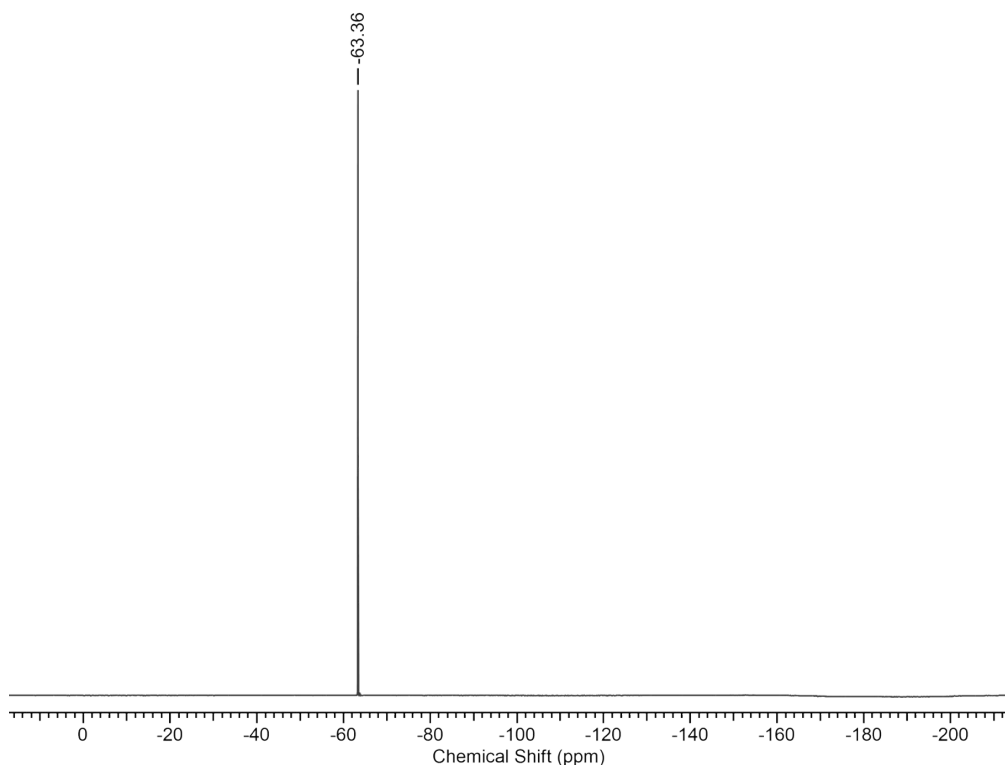

**Figure S13:  $^{19}\text{F}$  NMR spectrum of compound **2a** in THF(D8).**

### **Synthesis of Compound 3a**

**Method 1:** Compound **2a** (0.100 g, 0.076 mmol) was dissolved in THF and was layered with pentane and kept at  $-30\text{ }^{\circ}\text{C}$  in freezer. Colourless crystals were obtained of compound **3a** in 12 hours. (Yield: 0.068 g, 81 %).

**Method 2:** Compound **5a** (0.100 g, 0.047 mmol) was dissolved in THF and layered with pentane and kept at room temperature. Colourless crystals were obtained of compound **3a** in 12 hours. (Yield: 0.98 g, 96 %)

Elemental analysis for  $\text{C}_{88}\text{H}_{72}\text{B}_2\text{O}_6\text{F}_{48}\text{Mg}$ : C, 48.41; H, 3.32. Found: C, 48.38; H, 3.33

$^1\text{H}$  NMR [500 MHz, 300K, THF(D8)]:  $\delta$  1.77 (quin, 4H,  $^3J_{\text{HH}} = 3.3\text{ Hz}$ , THF, *m*- $\text{CH}_2$ ), 3.61 (t, 4H,  $^3J_{\text{HH}} = 6.5\text{ Hz}$ , THF, *o*- $\text{CH}_2$ ) 7.57 (s, 4H, *p*-CH), 7.78 (s, 8H, *o*-CH)

$^{13}\text{C}\{^1\text{H}\}$  NMR [125.74 MHz, 300K, THF(D8)]:  $\delta$  26.4 (THF, *m*-C), 68.2 (THF, *o*-C), 118.27 (b sept,  $^3J_{\text{CF}} = 3.8\text{ Hz}$ , *p*-C), 125.5 (q,  $^1J_{\text{CF}} = 271.6\text{ Hz}$ ,  $\text{CF}_3$ ), 130.0 [qq, ( $^3J_{\text{CB}} = 3.0\text{ Hz}$ ,  $^2J_{\text{CF}} = 31.5\text{ Hz}$ ) *m*-C], 135.6 (*o*-C), 162.8 (q,  $^1J_{\text{BC}} = 49.6\text{ Hz}$ , *ipso*-C)

$^{11}\text{B}$  [160 MHz, 300K, THF(D8)]:  $\delta$  - 6.50 (s,  $\text{B}\{\text{C}_6\text{H}_3(\text{CF}_3)_2\}_4$ )

$^{19}\text{F}$  [470.58 MHz, 300K, THF(D8)]:  $\delta$  -63.36 (s,  $\text{CF}_3$ )

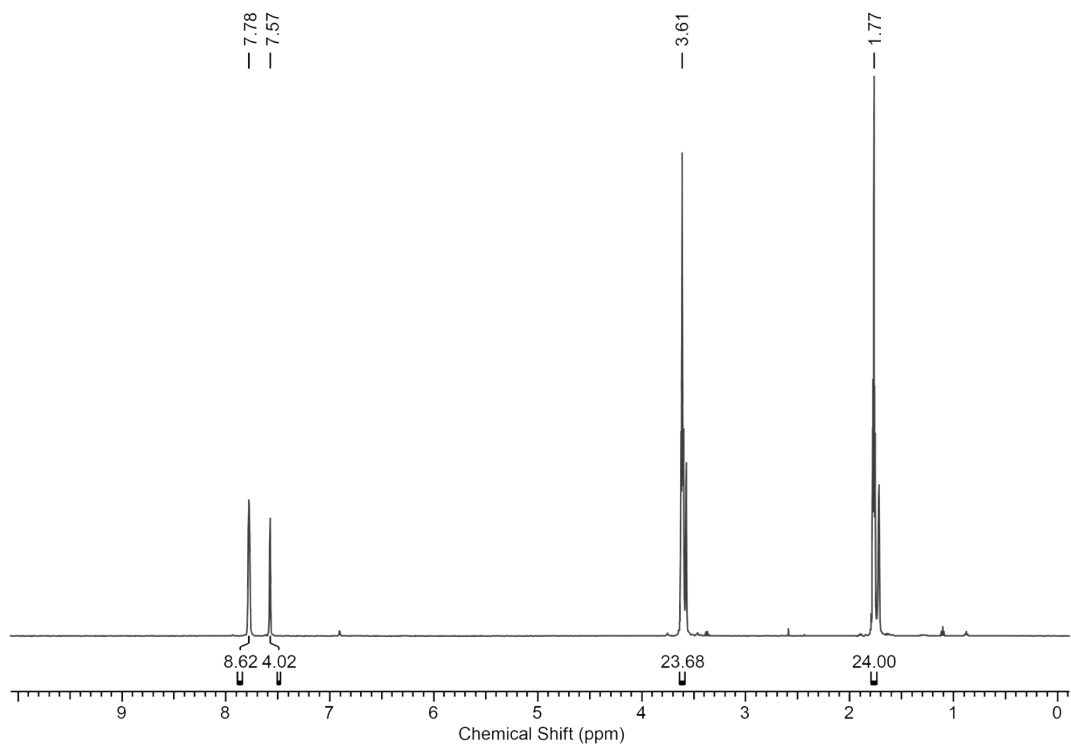

Figure S14:  $^1\text{H}$  NMR spectrum of compound 3a in THF(D8).

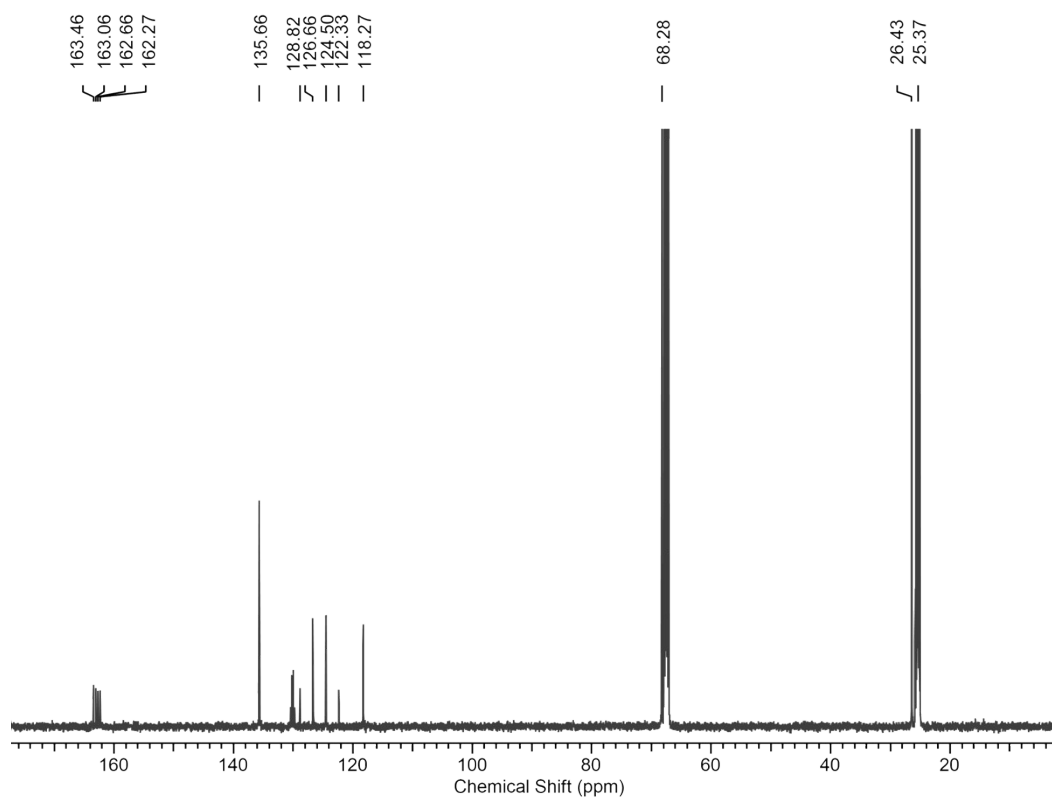

Figure S15:  $^{13}\text{C}\{^1\text{H}\}$  NMR of compound 3a in THF(D8).

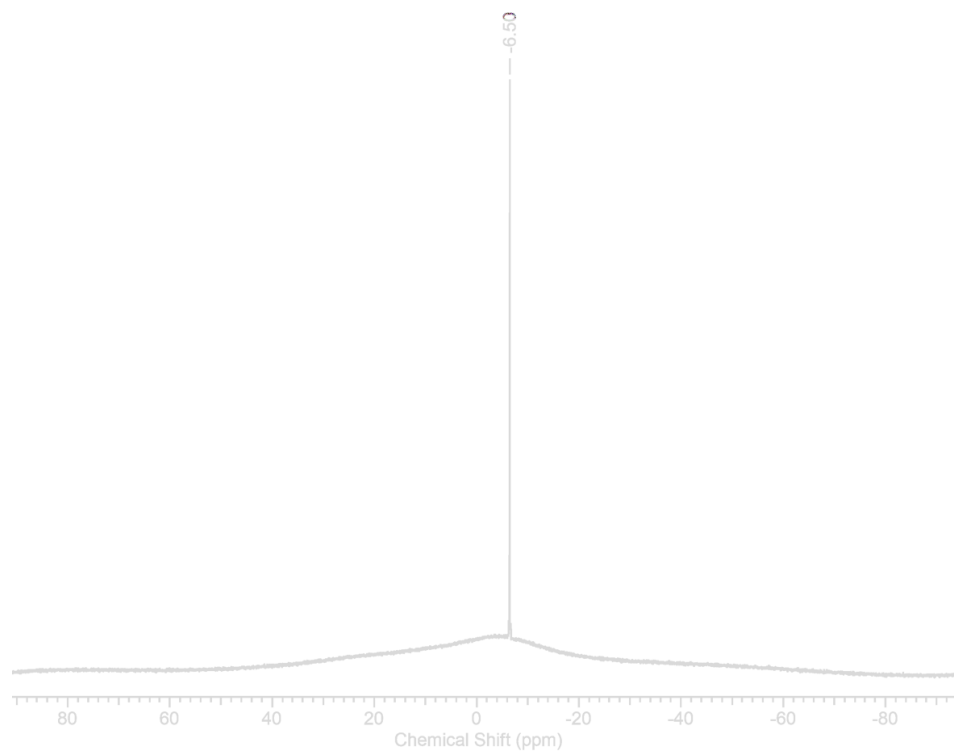

**Figure S16:  $^{11}\text{B}$  NMR spectrum of compound 3a in THF(D8).**

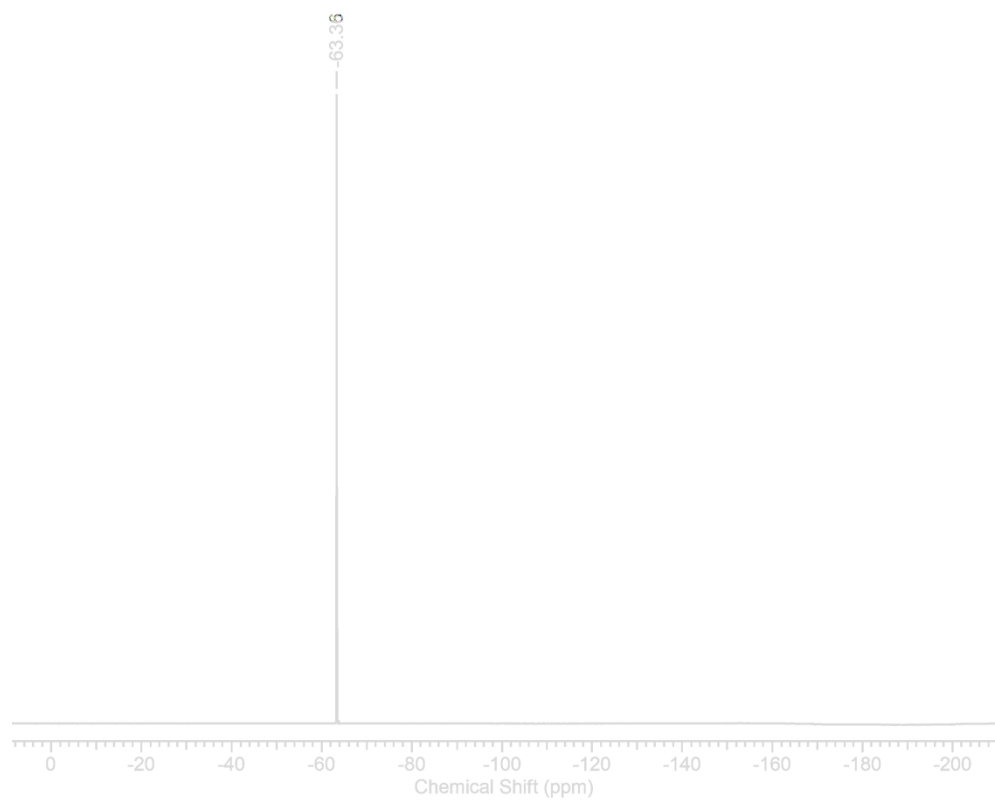

**Figure S17:  $^{19}\text{F}$  NMR spectrum of compound 3a in THF(D8).**

### Reaction of 1a with phenylbenzoate

Crystals of **1a** [(pmdta)Mg-*n*-Bu][B{C<sub>6</sub>H<sub>3</sub>(CF<sub>3</sub>)<sub>2</sub>}]<sub>4</sub>] (0.100 g, 0.089 mmol) and phenylbenzoate (0.009 g, 0.045 mmol) was added to a vial in glove box and to the solid mixture 5 mL toluene was added. The reaction mixture was stirred for 12 hours and toluene was removed under vacuum. THF was added to the residual solid and layered with pentane. After 2 hours crystals of Mg(THF)<sub>6</sub><sup>2+</sup> was obtained and the residual solution was decanted. The decanted solution was removed under vacuum and NMR spectrum of the residual solid was recorded in C<sub>6</sub>D<sub>6</sub>. (Yield: 0.039 g, 79 %)

Thereafter, the product was extracted in diethyl ether and washed with 2M HCl solution. Volatiles were evaporated under reduced pressure and crude sample was obtained as yellow oil. Product formation was confirmed using GC-MS analysis.

**<sup>1</sup>H NMR [500 MHz, 300K, THF(D8)]:** δ 0.76 ppm, (t, 6H, <sup>3</sup>J<sub>HH</sub> = 7.3 Hz, OCHCH<sub>2</sub>CH<sub>2</sub>CH<sub>2</sub>CH<sub>3</sub>), 0.79 (sext, 4H, <sup>3</sup>J<sub>HH</sub> = 4.7 Hz, OCHCH<sub>2</sub>CH<sub>2</sub>CH<sub>2</sub>CH<sub>3</sub>), 1.64 (m, 4H, OCHCH<sub>2</sub>CH<sub>2</sub>CH<sub>2</sub>CH<sub>3</sub>), 1.76 (m, 4H, OCHCH<sub>2</sub>CH<sub>2</sub>CH<sub>2</sub>CH<sub>3</sub>), 1.97 (m, 4H, OCHCH<sub>2</sub>CH<sub>2</sub>CH<sub>2</sub>CH<sub>3</sub>), 6.16 (t, 2H, <sup>3</sup>J<sub>HH</sub> = 7.2 Hz, OCHCH<sub>2</sub>CH<sub>2</sub>CH<sub>2</sub>CH<sub>3</sub>), 7.03 (t, 2H, <sup>3</sup>J<sub>HH</sub> = 1.3 Hz, PhO<sup>-</sup>, *p*-CH), 7.05 (t, 4H, <sup>3</sup>J<sub>HH</sub> = 1.29 Hz, PhO<sup>-</sup>, *m*-CH), 7.08 (t, 2H, <sup>3</sup>J<sub>HH</sub> = 1.45 Hz, *p*-CH), 7.12 (t, 4H, <sup>3</sup>J<sub>HH</sub> = 1.3 Hz, *m*-CH), 7.36 (d, 4H, <sup>3</sup>J<sub>HH</sub> = 7.2 Hz, PhO<sup>-</sup>, *o*-CH), 8.19 (d, 4H, <sup>3</sup>J<sub>HH</sub> = 7.0 Hz, *o*-CH)

**<sup>13</sup>C{<sup>1</sup>H} NMR [125.74 MHz, 300K, THF(D8)]:** δ 14.2 (OCHCH<sub>2</sub>CH<sub>2</sub>CH<sub>2</sub>CH<sub>3</sub>), 22.8 (OCHCH<sub>2</sub>CH<sub>2</sub>CH<sub>2</sub>CH<sub>3</sub>), 28.0 (OCHCH<sub>2</sub>CH<sub>2</sub>CH<sub>2</sub>CH<sub>3</sub>), 36.6 (OCHCH<sub>2</sub>CH<sub>2</sub>CH<sub>2</sub>CH<sub>3</sub>), 76.8 (OCHCH<sub>2</sub>CH<sub>2</sub>CH<sub>2</sub>CH<sub>3</sub>), 122.1 (PhO<sup>-</sup>, *o*-CH), 125.8 (PhO<sup>-</sup>, *p*-CH), 126.9 (*p*-CH), 128.5 (*o*-CH), 129.9 (PhO<sup>-</sup>, *m*-CH), 132.8 (*i*-CH), 141.5 (PhO<sup>-</sup>, *i*-CH)

**EI-MS (m/z):** mass calculated [M]<sup>+</sup> for C<sub>16</sub>H<sub>16</sub>O: 164.12; m/z found, 164.06. Literature reference<sup>3</sup>

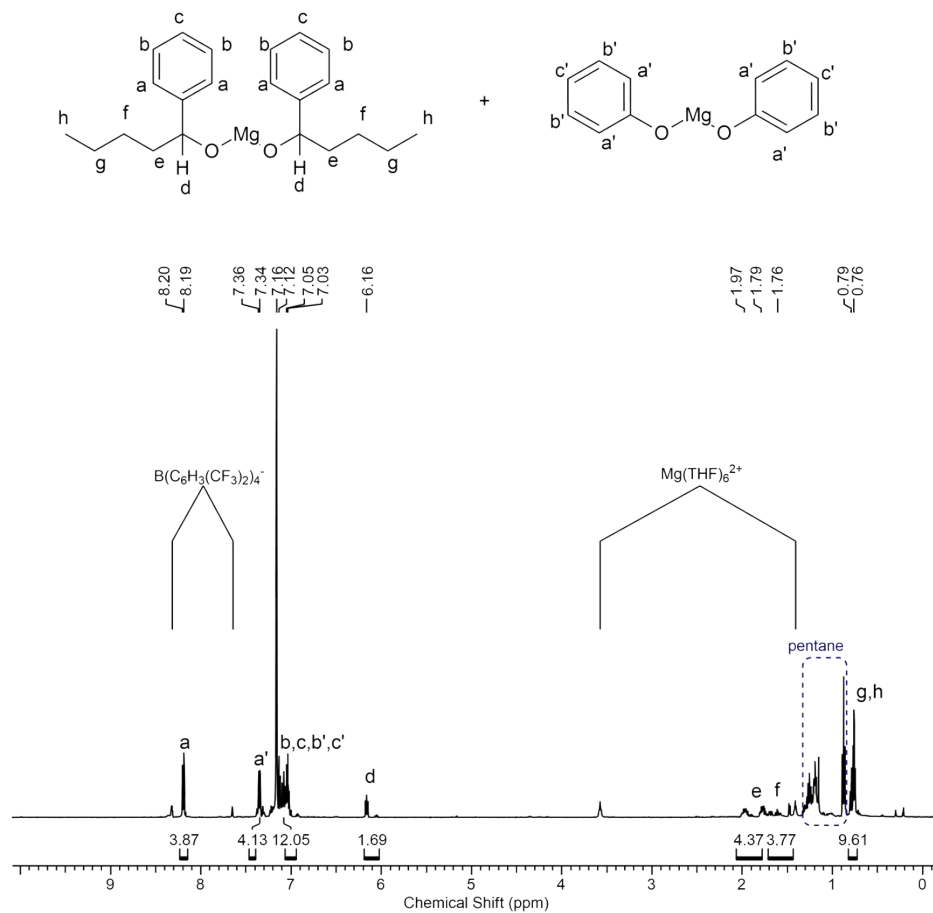

Figure S18:  $^1\text{H}$  NMR spectrum of reaction between 1a and phenylbenzoate in  $\text{C}_6\text{D}_6$ .

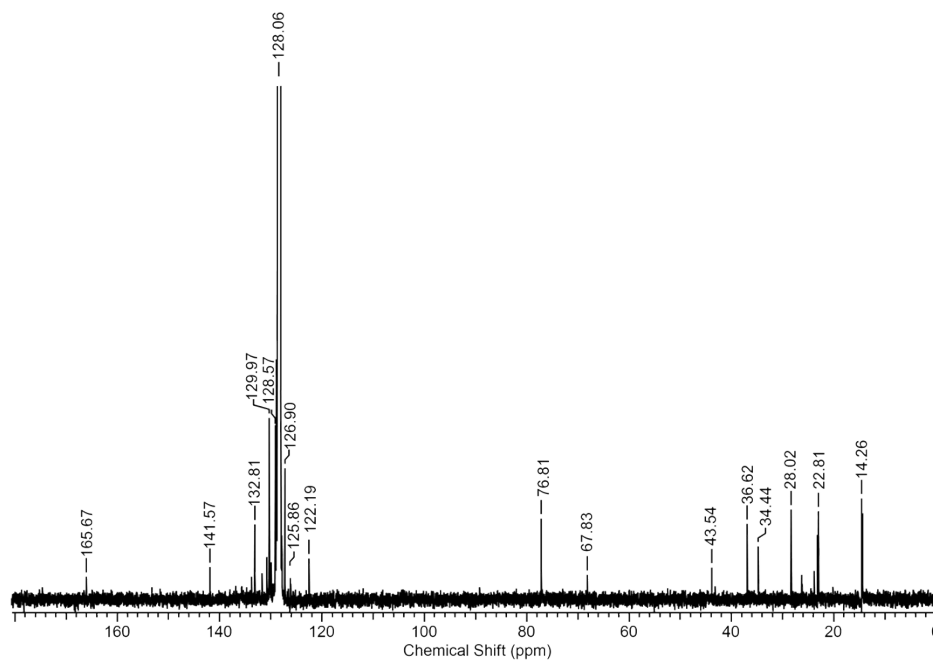

Figure S19:  $^{13}\text{C}\{^1\text{H}\}$  NMR spectrum of reaction between 1a and phenylbenzoate in  $\text{C}_6\text{D}_6$ .



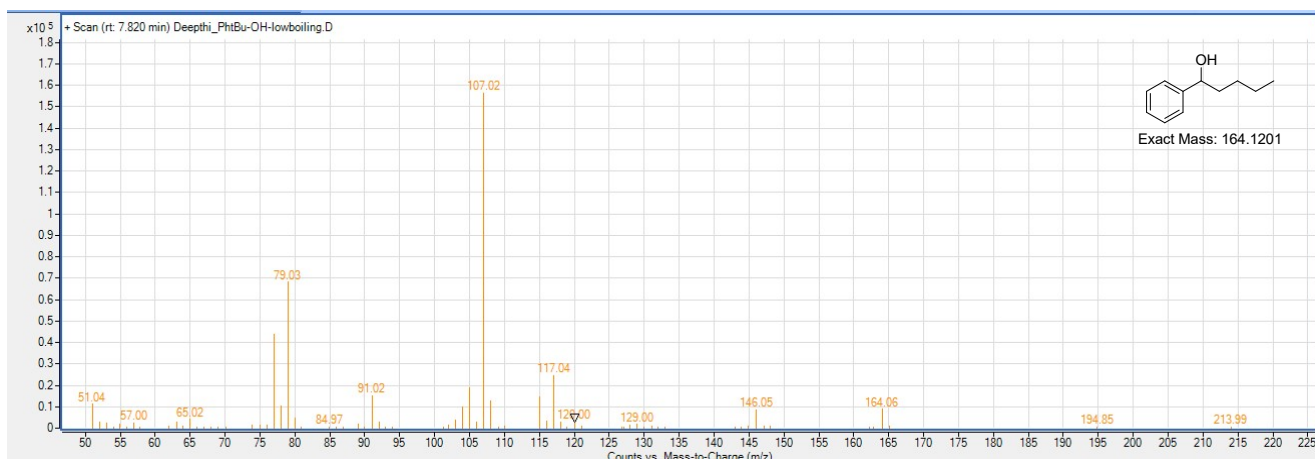

Figure S20: GC-MS spectrum of the product obtained. Literature reference<sup>3</sup>

### Synthesis of Compound 4a

Crystals of **1a** [(pmdta)Mg-*n*-Bu][B{C<sub>6</sub>H<sub>3</sub>(CF<sub>3</sub>)<sub>2</sub>]<sub>4</sub>] (0.100 g, 0.089 mmol) was dissolved in 3 mL of dry THF inside the glove box and HBpin (0.013 mL, 0.089 mmol) was added to the solution. Cooling the reaction mixture to -25 °C led to the isolation of **3a**. Colourless crystals of **4a** were obtained after layering with pentane and keeping the solution at room temperature for 24 hours. (Exact yield of **4a** cannot be determined because of impurity of **3a**)

**<sup>1</sup>H NMR [500 MHz, 300K, THF(D<sub>8</sub>)]:** δ 1.18 (s, 24H, Mg-(O<sub>2</sub>C<sub>2</sub>(CH<sub>3</sub>)<sub>4</sub>), 2.44 (s, 6H, pmdta (Me)N(CH<sub>2</sub>CH<sub>2</sub>NMe<sub>2</sub>)<sub>2</sub>), 2.58 (s, 24H, pmdta (Me)N(CH<sub>2</sub>CH<sub>2</sub>NMe<sub>2</sub>)<sub>2</sub>), 2.65 (t, 8H, <sup>3</sup>J<sub>HH</sub> = 5.3 Hz, pmdta (Me)N(CH<sub>2</sub>CH<sub>2</sub>NMe<sub>2</sub>)<sub>2</sub>), 2.80 (s, 8H, <sup>3</sup>J<sub>HH</sub> = 5.9 Hz, pmdta (Me)N(CH<sub>2</sub>CH<sub>2</sub>NMe<sub>2</sub>)<sub>2</sub>), 4.53 (s, 2H, Mg<sub>2</sub>(μ-H<sub>2</sub>)), 7.57 (s, 8H, *p*-CH), 7.78 (s, 16H, *o*-CH)

**<sup>13</sup>C{<sup>1</sup>H} NMR [125.74 MHz, 300K, THF(D<sub>8</sub>)]:** δ (14.41 ppm, Mg-(O<sub>2</sub>C<sub>2</sub>(CH<sub>3</sub>)<sub>4</sub>), δ 23.2 (Mg-(O<sub>2</sub>C<sub>2</sub>(CH<sub>3</sub>)<sub>4</sub>), 43.4 (pmdta (Me)N(CH<sub>2</sub>CH<sub>2</sub>NMe<sub>2</sub>)<sub>2</sub>), 46.2 (pmdta (Me)N(CH<sub>2</sub>CH<sub>2</sub>NMe<sub>2</sub>)<sub>2</sub>), 57.5 (pmdta (Me)N(CH<sub>2</sub>CH<sub>2</sub>NMe<sub>2</sub>)<sub>2</sub>), 58.9 (pmdta (Me)N(CH<sub>2</sub>CH<sub>2</sub>NMe<sub>2</sub>)<sub>2</sub>), 118.2 (b sept, <sup>3</sup>J<sub>CF</sub> = 3.8 Hz, *p*-C), 125.5 (q, <sup>1</sup>J<sub>CF</sub> = 271.6 Hz, CF<sub>3</sub>), 130.0 [qq, (<sup>3</sup>J<sub>CB</sub> = 3.5 Hz, <sup>2</sup>J<sub>CF</sub> = 31.5 Hz) *m*-C], 135.6(*o*-C), 162.8 (q, <sup>1</sup>J<sub>BC</sub> = 49.6 Hz, *ipso*-C)

**<sup>11</sup>B [160 MHz, 300K, THF(D<sub>8</sub>)]:** δ - 6.52 (s, B{C<sub>6</sub>H<sub>3</sub>(CF<sub>3</sub>)<sub>2</sub>]<sub>4</sub>), - 15.4 (s, BH<sub>3</sub><sup>-</sup>)

**<sup>19</sup>F [470.58 MHz, 300K, THF(D<sub>8</sub>)]:** δ -63.3(s, CF<sub>3</sub>)

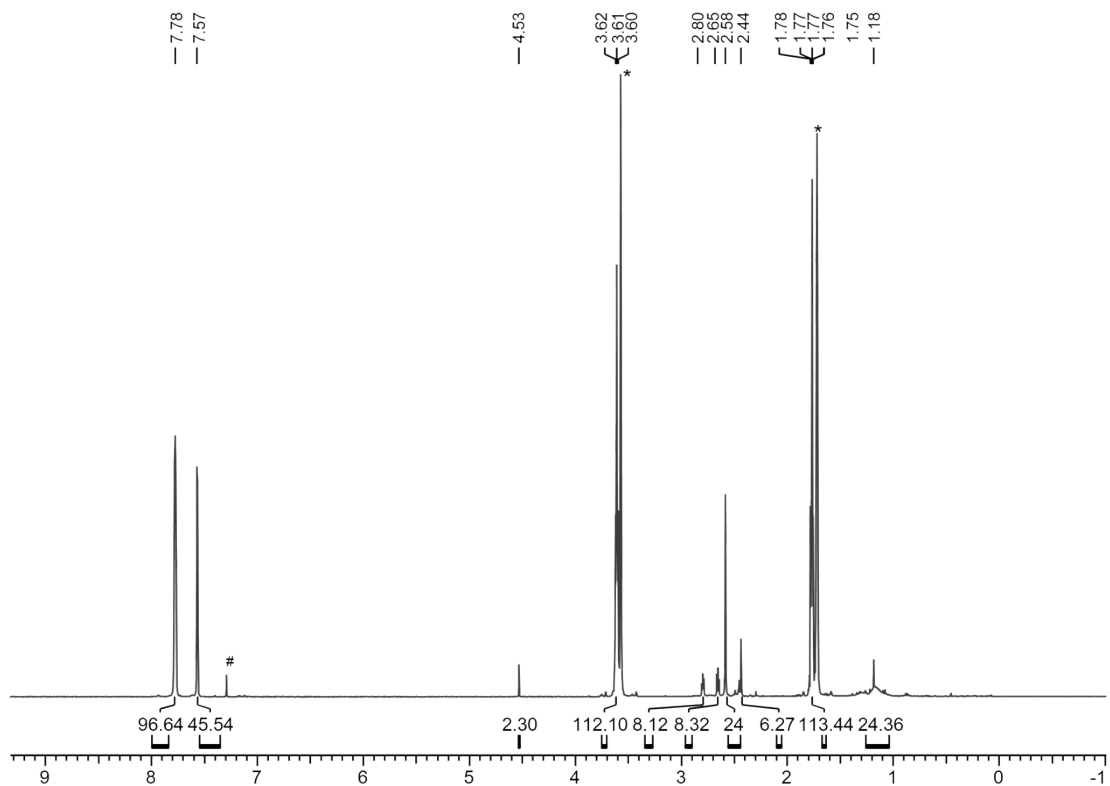

Figure S21:  $^1\text{H}$  NMR spectrum of compound 4a in THF(D8). \* THF(D8) peaks, #  $\text{C}_6\text{H}_6$  impurity in THF(D8).

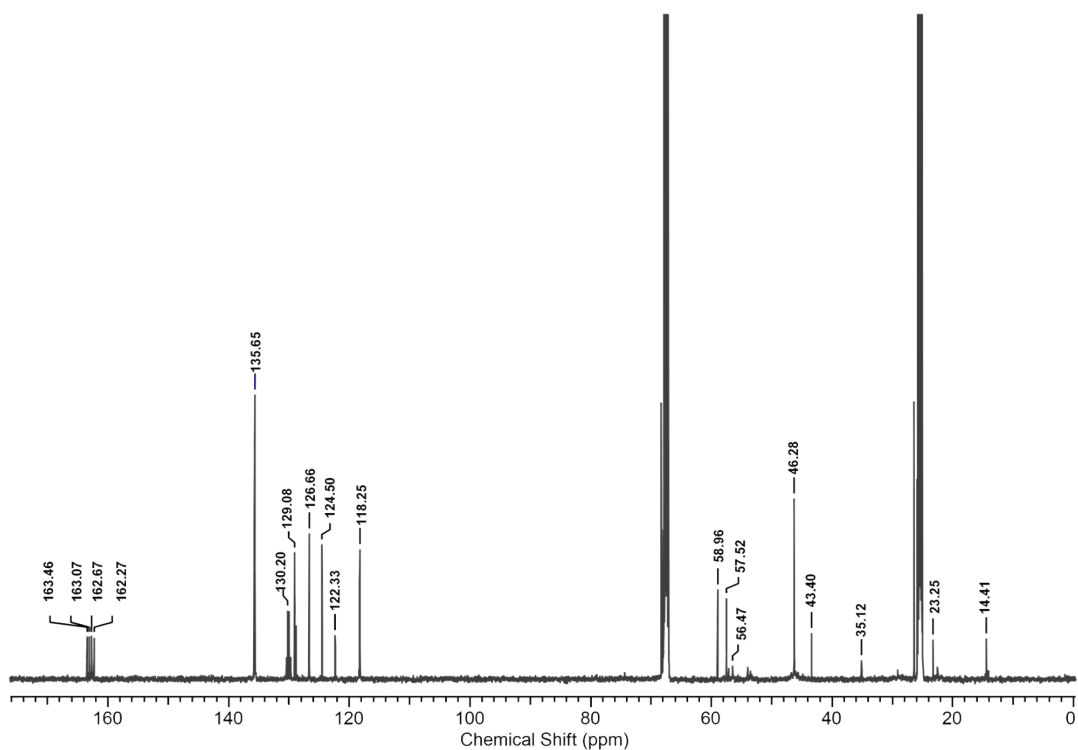

Figure S22:  $^{13}\text{C}\{^1\text{H}\}$  NMR of compound 4a in THF(D8).

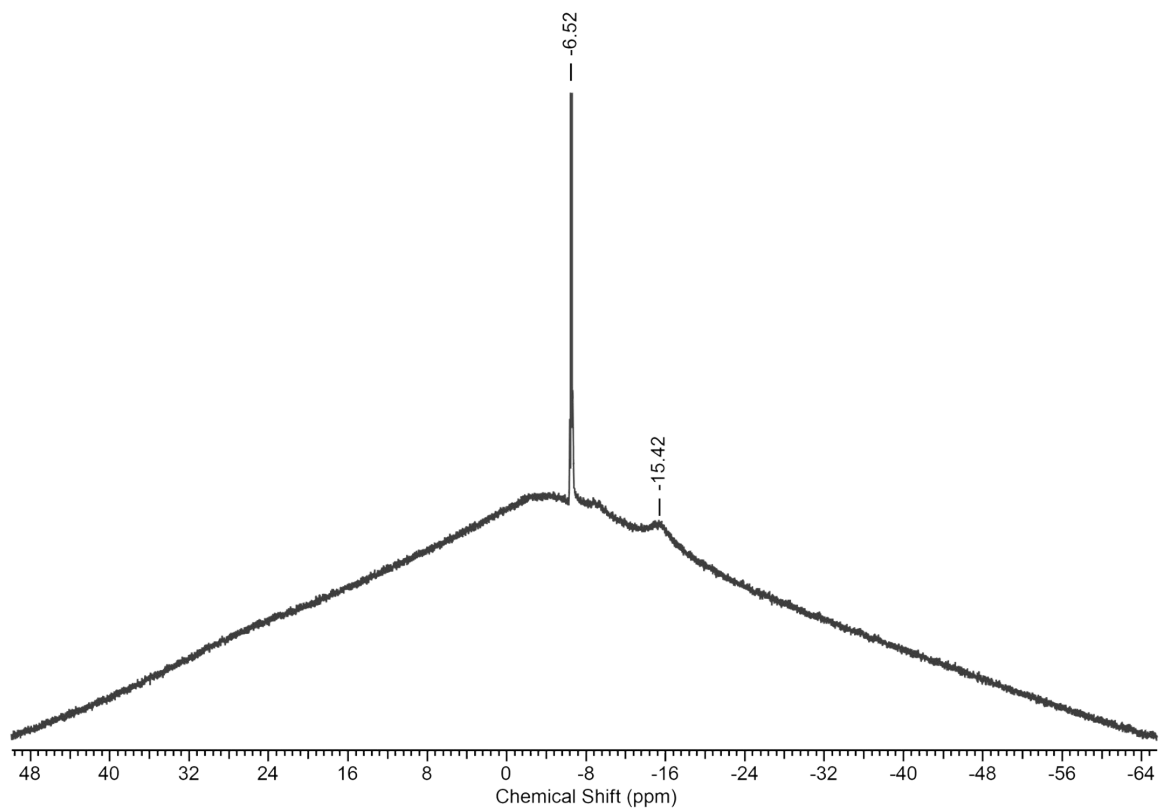

Figure S23:  $^{11}\text{B}$  NMR spectrum of compound 4a in THF(D<sub>8</sub>).

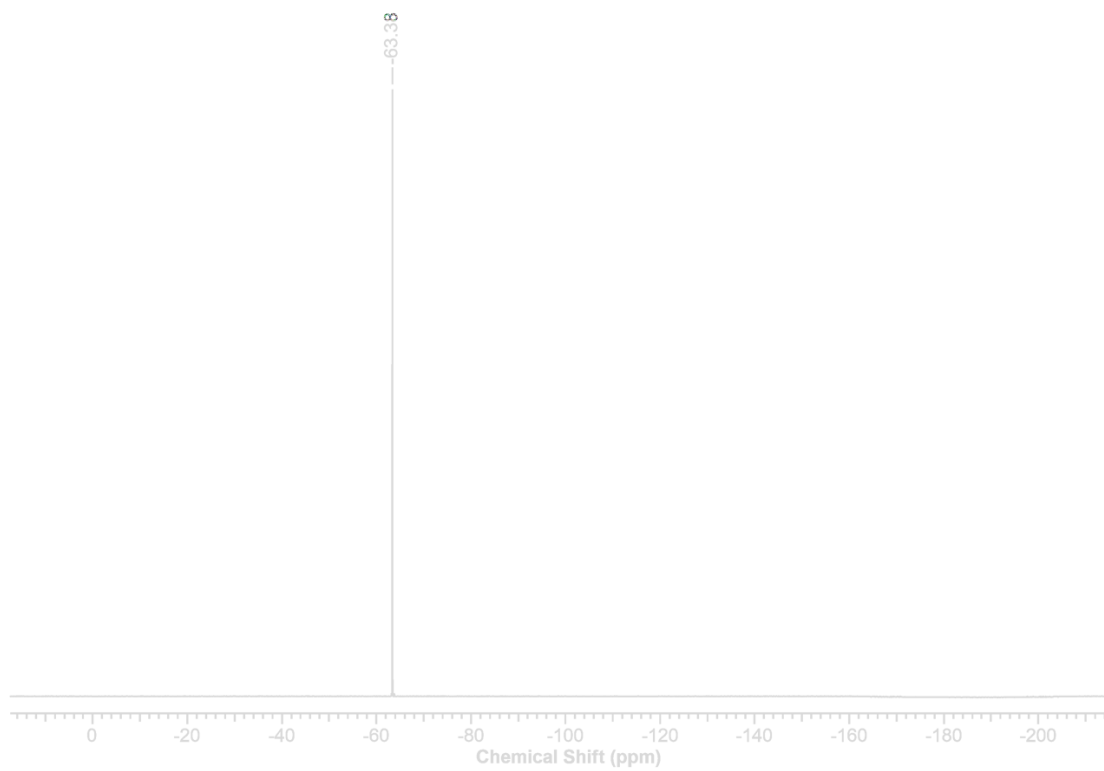

Figure S24:  $^{19}\text{F}$  NMR spectrum of compound 4a in THF(D<sub>8</sub>).

## Synthesis of compound 5a

**Method 1:** Crystals of **1a** [(pmdta)Mg-*n*-Bu][B{C<sub>6</sub>H<sub>3</sub>(CF<sub>3</sub>)<sub>2</sub>}]<sub>4</sub> (0.100 g, 0.089 mmol) was dissolved in dry Et<sub>2</sub>O and HBpin (0.012 mL, 0.089 mmol) was added drop wise into the solution and instant precipitation of compound **5a** was observed. (Yield: 0.087 g, 92 %).

**Method 2:** Crystals of **1a** [(pmdta)Mg-*n*-Bu][B{C<sub>6</sub>H<sub>3</sub>(CF<sub>3</sub>)<sub>2</sub>}]<sub>4</sub> (0.100 g, 0.089 mmol) was dissolved in dry Et<sub>2</sub>O and five-fold excess of PhSiH<sub>3</sub> (0.054 mL, 0.445 mmol) was added in to the solution and the solution was stirred for 48 hours leading to the precipitation of **5a**. Crystals of **5a** was grown by keeping the solution of PhSiH<sub>3</sub> and **1a** for 48 hours at -30 °C for 24 hours. (Yield: 0.079 g, 84 %).

Elemental analysis for Mg<sub>2</sub>N<sub>6</sub>C<sub>82</sub>H<sub>72</sub>B<sub>2</sub>F<sub>48</sub>: C, 46.38; H, 3.42; N, 3.96. Found: C, 46.36; H, 3.45; N, 3.93

**<sup>1</sup>H NMR [500 MHz, 300K, THF(D8)]:** δ 2.15 (s, 24H, pmdta (Me)N(CH<sub>2</sub>CH<sub>2</sub>NMe<sub>2</sub>)<sub>2</sub>), 2.19 (s, 6H, pmdta (Me)N(CH<sub>2</sub>CH<sub>2</sub>NMe<sub>2</sub>)<sub>2</sub>), 2.30 (t, 8H, <sup>3</sup>J<sub>HH</sub> = 6.8 Hz, pmdta (Me)N(CH<sub>2</sub>CH<sub>2</sub>NMe<sub>2</sub>)<sub>2</sub>), 2.41 (s, 8H, <sup>3</sup>J<sub>HH</sub> = 6.5 Hz, pmdta (Me)N(CH<sub>2</sub>CH<sub>2</sub>NMe<sub>2</sub>)<sub>2</sub>), 4.53 (s, 2H, Mg<sub>2</sub>(μ-H<sub>2</sub>)), 7.57 (s, 8H, *p*-CH), 7.78 (s, 16H, *o*-CH)

**<sup>11</sup>B [160 MHz, 300K, THF(D8)]:** δ -6.5 (s, B{C<sub>6</sub>H<sub>3</sub>(CF<sub>3</sub>)<sub>2</sub>})<sub>4</sub>)

**<sup>19</sup>F [470.58 MHz, 300K, THF(D8)]:** δ -63.3 (s, CF<sub>3</sub>)

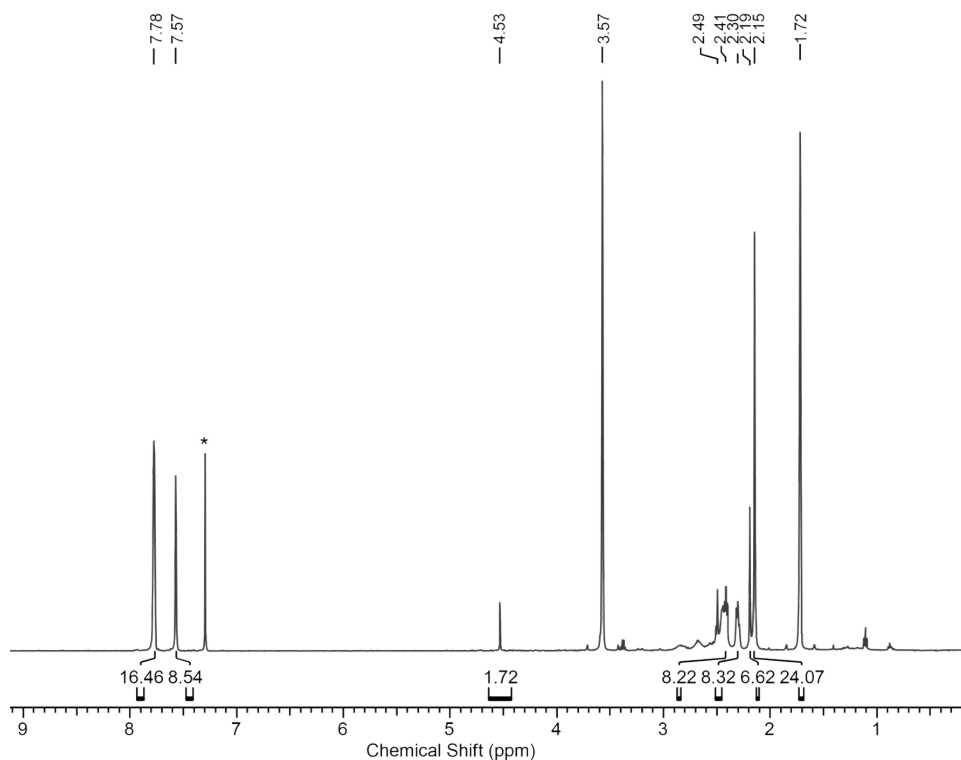

Figure S25: <sup>1</sup>H NMR spectrum of compound **5a** in THF(D8).

### Reaction of 5a with carbon monoxide

Crystals of **5a**  $[(\text{pmdta})\text{Mg-H}]_2[\text{B}\{\text{C}_6\text{H}_3(\text{CF}_3)_2\}_4]_2$  (0.100 g, 0.047 mmol) was added in a solvent tube fitted with J Young tap and dry  $\text{Et}_2\text{O}$  was added making a suspension of **5a**. The solvent tube was degassed twice and 1 atm of carbon monoxide was purged into the solvent tube. The reaction mixture was stirred for 12 hours and all the solvent was removed under vacuum. NMR of the obtained solid was recorded in dry THF( $\text{D}_8$ ).

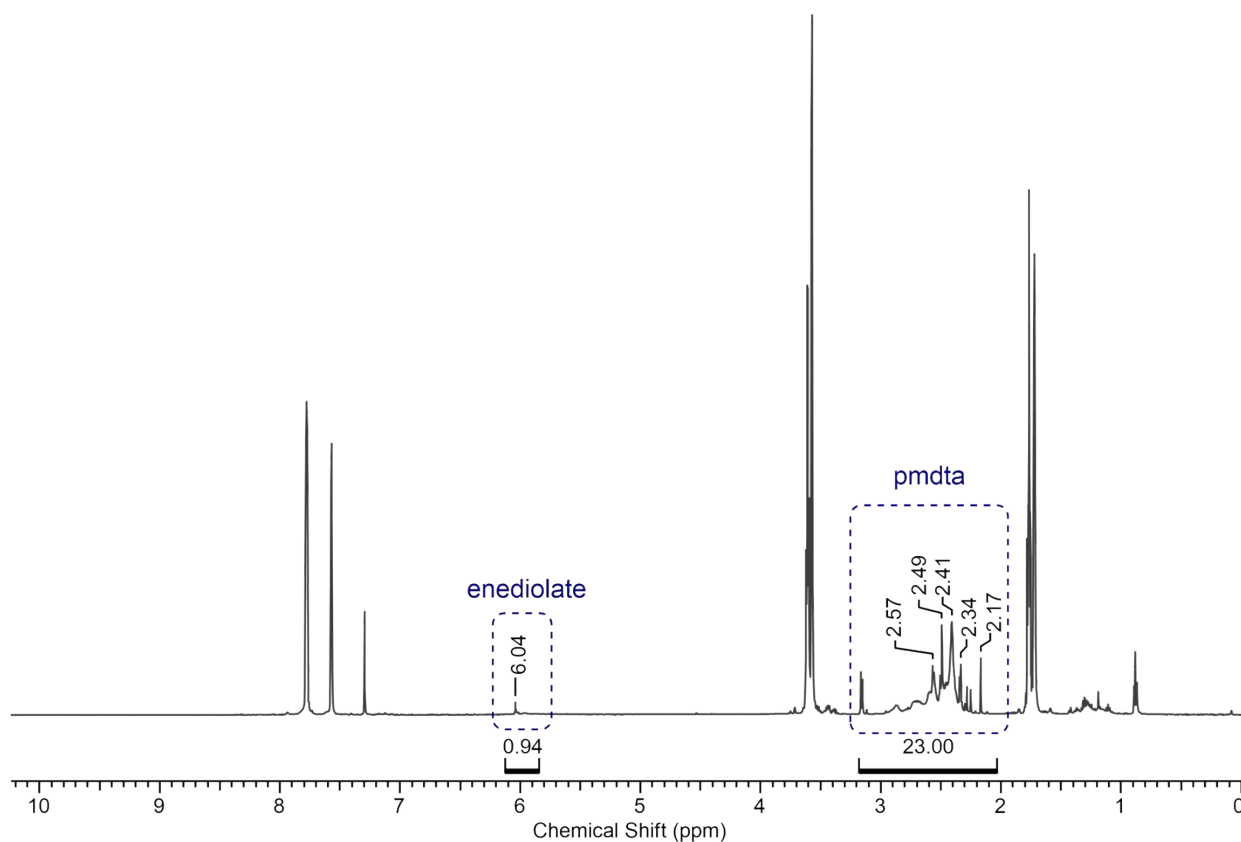

**Figure S26:**  $^1\text{H}$  NMR spectrum of reaction between compound **5a** and carbon monoxide.

### 3. Crystallographic Data

Crystals were layered with Paratone oil before mounting on diffractometer. Single-crystal X-ray crystallography for structural analysis was performed on a Bruker Kappa APEX II CCD Diffractometer, using Mo-K $\alpha$  radiation, having a wavelength of 0.71073 Å, equipped with a CCD detector by using the APEX software package.<sup>4</sup> A matrix scan was used to determine the initial lattice parameters. Reflections were merged and corrected for Lorenz and polarization effects and background using SAINT.<sup>5</sup> Absorption corrections, including odd and even ordered spherical harmonics were performed using SADABS.<sup>6</sup> Space group assignments were based upon systematic absences, E statistics, and successful refinement of the structures. The structures were solved by SHELXT (version 2018/2) and refined by SHELXTL (version 2018/3) software package installed in the platform WinGX.<sup>7,8</sup> All non-hydrogen atoms, including those in disordered molecules, were refined anisotropically. Hydrogen atoms are placed at calculated positions and refined using a riding model. Crystallographic data, details of data collection and structure refinement parameters for compound **1b**, **2a**, **3a**, **4a** and **5a** are presented below:

**Table S1.** Crystal data and structure refinement for **1b**.

|                                   |                                                             |                                          |
|-----------------------------------|-------------------------------------------------------------|------------------------------------------|
| Identification code               | <b>1b</b>                                                   |                                          |
| CCDC Number                       | 2216372                                                     |                                          |
| Empirical formula                 | $C_{37}H_{32}BF_{20}MgN_3$                                  |                                          |
| Formula weight                    | 933.77                                                      |                                          |
| Temperature                       | 140(2) K                                                    |                                          |
| Wavelength                        | 0.71073 Å                                                   |                                          |
| Crystal system                    | Monoclinic                                                  |                                          |
| Space group                       | P 21/c                                                      |                                          |
| Unit cell dimensions              | a = 14.9256(14) Å<br>b = 20.6814(18) Å<br>c = 13.6544(12) Å | a = 90°.<br>b = 109.490(3)°.<br>g = 90°. |
| Volume                            | 3973.4(6) Å <sup>3</sup>                                    |                                          |
| Z                                 | 4                                                           |                                          |
| Density (calculated)              | 1.561 Mg/m <sup>3</sup>                                     |                                          |
| Absorption coefficient            | 0.172 mm <sup>-1</sup>                                      |                                          |
| F(000)                            | 1888                                                        |                                          |
| Crystal size                      | 0.170 x 0.120 x 0.080 mm <sup>3</sup>                       |                                          |
| Theta range for data collection   | 2.444 to 24.998°.                                           |                                          |
| Index ranges                      | -17<=h<=17, -24<=k<=24, -16<=l<=16                          |                                          |
| Reflections collected             | 55572                                                       |                                          |
| Independent reflections           | 6997 [R(int) = 0.0414]                                      |                                          |
| Completeness to theta = 24.998°   | 99.9 %                                                      |                                          |
| Absorption correction             | Semi-empirical from equivalents                             |                                          |
| Max. and min. transmission        | 0.986 and 0.971                                             |                                          |
| Refinement method                 | Full-matrix least-squares on F <sup>2</sup>                 |                                          |
| Data / restraints / parameters    | 6997 / 102 / 615                                            |                                          |
| Goodness-of-fit on F <sup>2</sup> | 1.042                                                       |                                          |
| Final R indices [I>2sigma(I)]     | R1 = 0.0426, wR2 = 0.1062                                   |                                          |
| R indices (all data)              | R1 = 0.0786, wR2 = 0.1321                                   |                                          |
| Extinction coefficient            | n/a                                                         |                                          |
| Largest diff. peak and hole       | 0.429 and -0.193 e.Å <sup>-3</sup>                          |                                          |

**Table S2.** Crystal data and structure refinement for **2a**.

|                                   |                                             |                  |
|-----------------------------------|---------------------------------------------|------------------|
| Identification code               | <b>2a</b>                                   |                  |
| CCDC Number                       | 2216373                                     |                  |
| Empirical formula                 | $C_{58}H_{56}BF_{24}MgN_3O_2$               |                  |
| Formula weight                    | 1318.17                                     |                  |
| Temperature                       | 296(2) K                                    |                  |
| Wavelength                        | 0.71073 Å                                   |                  |
| Crystal system                    | Monoclinic                                  |                  |
| Space group                       | C2/c                                        |                  |
| Unit cell dimensions              | a = 54.944(5) Å                             | a = 90°.         |
|                                   | b = 17.9070(14) Å                           | b = 106.948(5)°. |
|                                   | c = 20.1401(16) Å                           | g = 90°.         |
| Volume                            | 18955(3) Å <sup>3</sup>                     |                  |
| Z                                 | 12                                          |                  |
| Density (calculated)              | 1.386 Mg/m <sup>3</sup>                     |                  |
| Absorption coefficient            | 0.141 mm <sup>-1</sup>                      |                  |
| F(000)                            | 8088                                        |                  |
| Crystal size                      | 0.105 x 0.095 x 0.085 mm <sup>3</sup>       |                  |
| Theta range for data collection   | 2.029 to 25.000°.                           |                  |
| Index ranges                      | -65<=h<=65, -21<=k<=21, -23<=l<=23          |                  |
| Reflections collected             | 246170                                      |                  |
| Independent reflections           | 16669 [R(int) = 0.1182]                     |                  |
| Completeness to theta = 25.000°   | 99.9 %                                      |                  |
| Absorption correction             | Semi-empirical from equivalents             |                  |
| Max. and min. transmission        | 0.94 and 0.88                               |                  |
| Refinement method                 | Full-matrix least-squares on F <sup>2</sup> |                  |
| Data / restraints / parameters    | 16669 / 5595 / 1708                         |                  |
| Goodness-of-fit on F <sup>2</sup> | 1.104                                       |                  |
| Final R indices [I>2sigma(I)]     | R1 = 0.0722, wR2 = 0.1264                   |                  |
| R indices (all data)              | R1 = 0.1606, wR2 = 0.1749                   |                  |
| Extinction coefficient            | n/a                                         |                  |
| Largest diff. peak and hole       | 0.288 and -0.259 e.Å <sup>-3</sup>          |                  |



**Table S3.** Crystal data and structure refinement for **3a**.

|                                   |                                             |                  |
|-----------------------------------|---------------------------------------------|------------------|
| Identification code               | <b>3a</b>                                   |                  |
| CCDC Number                       | 2216374                                     |                  |
| Empirical formula                 | $C_{100}H_{96}B_2F_{48}MgO_9$               |                  |
| Formula weight                    | 2399.69                                     |                  |
| Temperature                       | 142(2) K                                    |                  |
| Wavelength                        | 0.71073 Å                                   |                  |
| Crystal system                    | Monoclinic                                  |                  |
| Space group                       | C 2/c                                       |                  |
| Unit cell dimensions              | a = 29.124(2) Å                             | a = 90°.         |
|                                   | b = 17.614(2) Å                             | b = 123.418(5)°. |
|                                   | c = 24.717(3) Å                             | g = 90°.         |
| Volume                            | 10583.1(19) Å <sup>3</sup>                  |                  |
| Z                                 | 4                                           |                  |
| Density (calculated)              | 1.506 Mg/m <sup>3</sup>                     |                  |
| Absorption coefficient            | 0.157 mm <sup>-1</sup>                      |                  |
| F(000)                            | 4888                                        |                  |
| Crystal size                      | 0.085 x 0.085 x 0.045 mm <sup>3</sup>       |                  |
| Theta range for data collection   | 1.750 to 24.999°.                           |                  |
| Index ranges                      | -34<=h<=30, -20<=k<=20, -27<=l<=29          |                  |
| Reflections collected             | 51561                                       |                  |
| Independent reflections           | 9322 [R(int) = 0.0635]                      |                  |
| Completeness to theta = 24.999°   | 99.9 %                                      |                  |
| Absorption correction             | Semi-empirical from equivalents             |                  |
| Max. and min. transmission        | 0.993 and 0.987                             |                  |
| Refinement method                 | Full-matrix least-squares on F <sup>2</sup> |                  |
| Data / restraints / parameters    | 9322 / 246 / 873                            |                  |
| Goodness-of-fit on F <sup>2</sup> | 1.019                                       |                  |
| Final R indices [I>2sigma(I)]     | R1 = 0.0763, wR2 = 0.1787                   |                  |
| R indices (all data)              | R1 = 0.1287, wR2 = 0.2166                   |                  |
| Extinction coefficient            | n/a                                         |                  |
| Largest diff. peak and hole       | 0.926 and -0.501 e.Å <sup>-3</sup>          |                  |

**Table S4.** Crystal data and structure refinement for **4a**.

|                                   |                                             |                  |
|-----------------------------------|---------------------------------------------|------------------|
| Identification code               | <b>4a</b>                                   |                  |
| CCDC Number                       | 2216375                                     |                  |
| Empirical formula                 | $C_{126}H_{166}B_4F_{48}Mg_4N_6O_{12}$      |                  |
| Formula weight                    | 3009.12                                     |                  |
| Temperature                       | 296(2) K                                    |                  |
| Wavelength                        | 0.71073 Å                                   |                  |
| Crystal system                    | Triclinic                                   |                  |
| Space group                       | P-1                                         |                  |
| Unit cell dimensions              | a = 13.0441(13) Å                           | a = 104.003(4)°. |
|                                   | b = 16.924(2) Å                             | b = 102.788(3)°. |
|                                   | c = 19.3835(17) Å                           | g = 112.038(3)°. |
| Volume                            | 3609.3(7) Å <sup>3</sup>                    |                  |
| Z                                 | 1                                           |                  |
| Density (calculated)              | 1.384 Mg/m <sup>3</sup>                     |                  |
| Absorption coefficient            | 0.145 mm <sup>-1</sup>                      |                  |
| F(000)                            | 1560                                        |                  |
| Crystal size                      | 0.110 x 0.078 x 0.038 mm <sup>3</sup>       |                  |
| Theta range for data collection   | 1.702 to 24.998°.                           |                  |
| Index ranges                      | -15<=h<=15, -20<=k<=20, -23<=l<=23          |                  |
| Reflections collected             | 86138                                       |                  |
| Independent reflections           | 12719 [R(int) = 0.1088]                     |                  |
| Completeness to theta = 24.998°   | 99.9 %                                      |                  |
| Absorption correction             | Semi-empirical from equivalents             |                  |
| Max. and min. transmission        | 0.96 and 0.92                               |                  |
| Refinement method                 | Full-matrix least-squares on F <sup>2</sup> |                  |
| Data / restraints / parameters    | 12719 / 1122 / 1157                         |                  |
| Goodness-of-fit on F <sup>2</sup> | 1.017                                       |                  |
| Final R indices [I>2sigma(I)]     | R1 = 0.0707, wR2 = 0.1710                   |                  |
| R indices (all data)              | R1 = 0.1367, wR2 = 0.2136                   |                  |
| Extinction coefficient            | n/a                                         |                  |
| Largest diff. peak and hole       | 0.829 and -0.495 e.Å <sup>-3</sup>          |                  |

**Table S5.** Crystal data and structure refinement for **5a**.

|                                   |                                                    |                                                    |
|-----------------------------------|----------------------------------------------------|----------------------------------------------------|
| Identification code               | <b>5a</b>                                          |                                                    |
| CCDC Number                       | 2216376                                            |                                                    |
| Empirical formula                 | $C_{41}H_{36}BF_{24}MgN_3$                         |                                                    |
| Formula weight                    | 1061.85                                            |                                                    |
| Temperature                       | 140(2) K                                           |                                                    |
| Wavelength                        | 0.71073 Å                                          |                                                    |
| Crystal system                    | Triclinic                                          |                                                    |
| Space group                       | P -1                                               |                                                    |
| Unit cell dimensions              | a = 12.79(3) Å<br>b = 13.69(3) Å<br>c = 14.16(3) Å | a = 94.01(5)°.<br>b = 99.53(5)°.<br>g = 96.29(5)°. |
| Volume                            | 2419(8) Å <sup>3</sup>                             |                                                    |
| Z                                 | 2                                                  |                                                    |
| Density (calculated)              | 1.458 Mg/m <sup>3</sup>                            |                                                    |
| Absorption coefficient            | 0.162 mm <sup>-1</sup>                             |                                                    |
| F(000)                            | 1072                                               |                                                    |
| Crystal size                      | 0.075 x 0.048 x 0.038 mm <sup>3</sup>              |                                                    |
| Theta range for data collection   | 1.990 to 24.997°.                                  |                                                    |
| Index ranges                      | -15<=h<=15, -16<=k<=16, -16<=l<=16                 |                                                    |
| Reflections collected             | 43978                                              |                                                    |
| Independent reflections           | 5511 [R(int) = 0.1354]                             |                                                    |
| Completeness to theta = 24.997°   | 99.9 %                                             |                                                    |
| Absorption correction             | Semi-empirical from equivalents                    |                                                    |
| Max. and min. transmission        | 0.997 and 0.989                                    |                                                    |
| Refinement method                 | Full-matrix least-squares on F <sup>2</sup>        |                                                    |
| Data / restraints / parameters    | 8511 / 293 / 830                                   |                                                    |
| Goodness-of-fit on F <sup>2</sup> | 1.003                                              |                                                    |
| Final R indices [I>2sigma(I)]     | R1 = 0.0840, wR2 = 0.2141                          |                                                    |
| R indices (all data)              | R1 = 0.2178, wR2 = 0.3082                          |                                                    |
| Extinction coefficient            | n/a                                                |                                                    |
| Largest diff. peak and hole       | 0.500 and -0.317 e.Å <sup>-3</sup>                 |                                                    |

#### 4. Computational Details

Geometry optimizations were performed using Gaussian16 suite of programs<sup>9</sup> using the Becke's 3-parameter hybrid functional,<sup>10</sup> combined with the non-local correlation functional provided by Perdew/Wang.<sup>11</sup> The 6-311+G(d) all-electron basis set was used for the magnesium atoms and the 6-311G(d,p) for the remaining atoms.<sup>12</sup> All stationary points have been identified for minimum (Nimag=0) or transition states (Nimag=1). Intrinsic Reaction Paths (IRPs)<sup>13</sup> were traced from the various transition structures to obtain the connected intermediates.

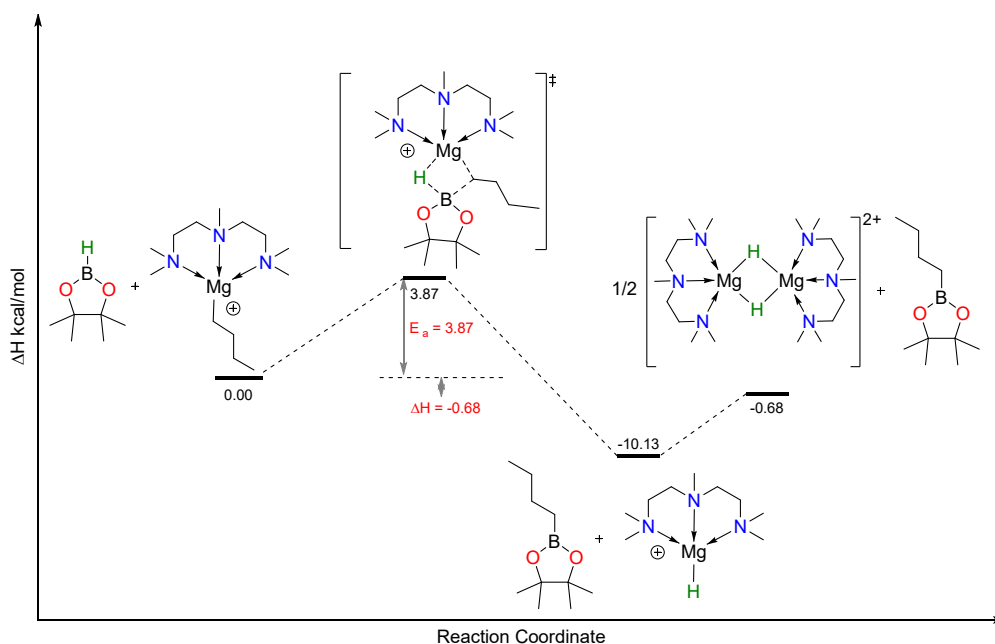

**Scheme S1: Computed energy profile at room temperature for the formation of compound 5a (Pathway - I) via reaction between compound 1a and HBpin.**

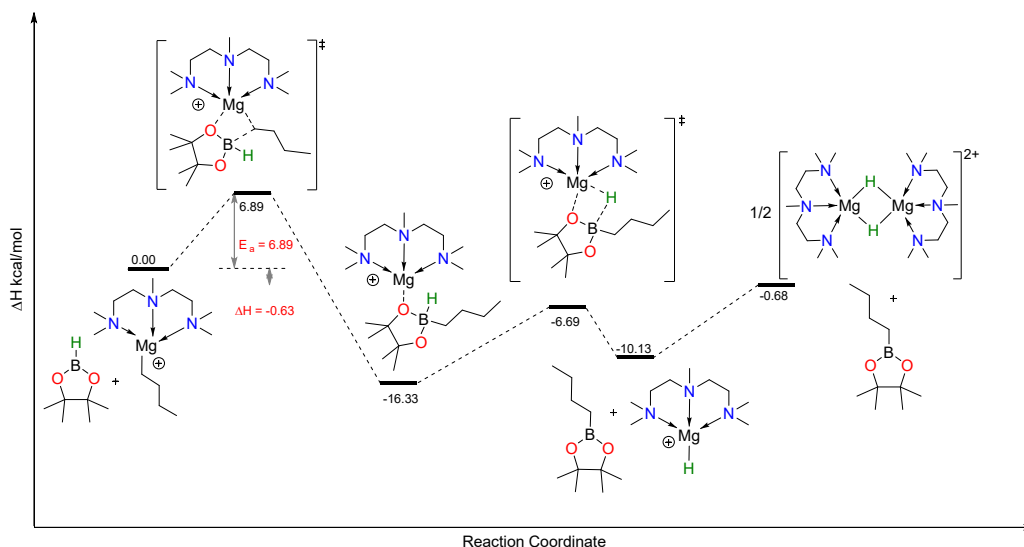

**Scheme S2: Computed energy profile at room temperature for the formation of compound 5a (Pathway - II) via reaction between compound 1a and HBpin.**

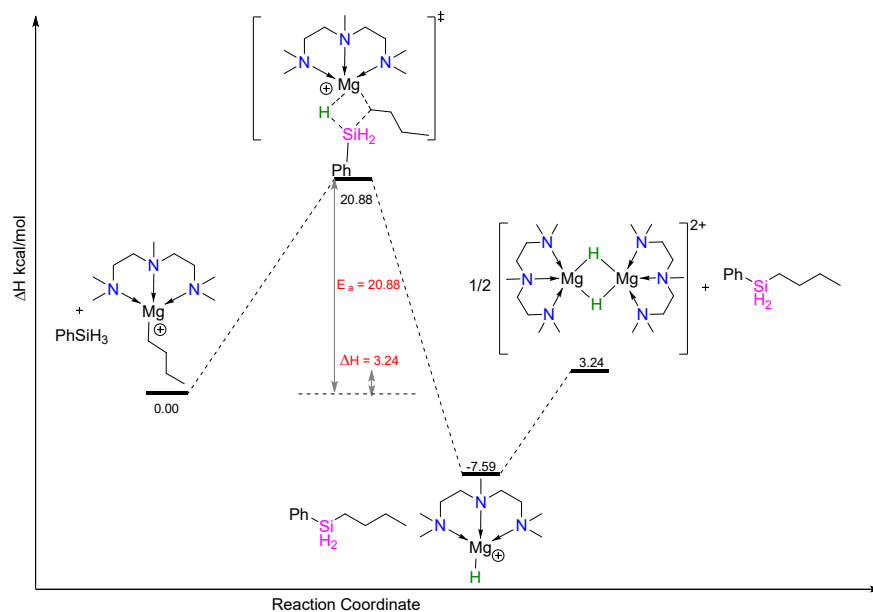

**Scheme S3: Computed energy profile at room temperature for the formation of compound 5a via reaction between compound 1a and PhSiH<sub>3</sub>.**

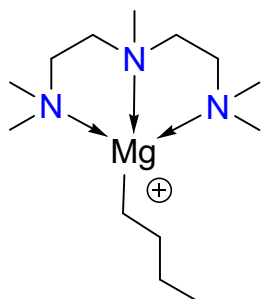

|   |             |              |              |
|---|-------------|--------------|--------------|
| C | 2.782443000 | 0.961262000  | -0.464039000 |
| H | 3.192943000 | 0.554180000  | 0.462671000  |
| H | 3.641060000 | 1.239263000  | -1.088621000 |
| C | 1.946643000 | 2.197948000  | -0.161338000 |
| H | 1.535472000 | 2.604370000  | -1.089787000 |
| H | 2.582751000 | 2.981783000  | 0.271596000  |
| C | 2.493493000 | -1.447439000 | -0.839624000 |
| H | 2.090249000 | -2.121784000 | -1.598633000 |

|   |              |              |              |
|---|--------------|--------------|--------------|
| H | 3.586367000  | -1.484070000 | -0.941668000 |
| C | 2.099747000  | -1.929619000 | 0.552068000  |
| H | 2.585482000  | -1.317608000 | 1.317839000  |
| H | 2.467741000  | -2.955342000 | 0.694357000  |
| C | 1.931677000  | 0.138750000  | -2.588646000 |
| H | 1.566142000  | 1.144361000  | -2.801836000 |
| H | 1.245601000  | -0.570065000 | -3.055629000 |
| H | 2.925279000  | 0.025731000  | -3.040156000 |
| C | -0.213425000 | 2.956812000  | 0.638402000  |
| H | -1.043380000 | 2.730919000  | 1.309557000  |
| H | -0.603642000 | 3.006764000  | -0.379344000 |
| H | 0.205881000  | 3.932736000  | 0.913280000  |
| C | 1.258081000  | 1.792725000  | 2.137913000  |
| H | 1.671282000  | 2.747671000  | 2.487691000  |
| H | 2.027964000  | 1.027161000  | 2.247934000  |
| H | 0.413820000  | 1.529873000  | 2.778149000  |
| C | 0.347459000  | -2.007552000 | 2.223762000  |
| H | -0.728520000 | -1.925656000 | 2.388390000  |
| H | 0.851433000  | -1.226020000 | 2.795482000  |
| H | 0.681344000  | -2.983016000 | 2.599776000  |
| C | -0.068165000 | -2.924424000 | 0.044738000  |
| H | 0.097686000  | -2.830617000 | -1.029576000 |
| H | -1.140810000 | -2.837610000 | 0.221645000  |
| H | 0.270558000  | -3.916573000 | 0.369432000  |
| C | -1.939415000 | 0.103640000  | -1.079089000 |
| H | -2.025327000 | 1.012707000  | -1.694853000 |
| H | -2.026758000 | -0.718989000 | -1.806348000 |
| C | -3.148872000 | 0.043699000  | -0.129123000 |
| H | -3.112647000 | -0.871856000 | 0.481613000  |
| H | -3.109433000 | 0.871880000  | 0.594767000  |

|    |              |              |              |
|----|--------------|--------------|--------------|
| N  | 1.975396000  | -0.090336000 | -1.130045000 |
| N  | 0.807900000  | 1.890673000  | 0.737207000  |
| N  | 0.640324000  | -1.857190000 | 0.785415000  |
| C  | -4.509911000 | 0.090833000  | -0.829417000 |
| H  | -4.565007000 | 1.007863000  | -1.429348000 |
| H  | -4.567085000 | -0.739492000 | -1.544415000 |
| C  | -5.694985000 | 0.029272000  | 0.129307000  |
| H  | -5.682119000 | 0.868218000  | 0.833121000  |
| H  | -6.646861000 | 0.065727000  | -0.407091000 |
| H  | -5.684474000 | -0.894734000 | 0.717153000  |
| Mg | -0.031411000 | 0.033730000  | -0.177889000 |

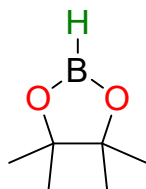

|   |              |              |              |
|---|--------------|--------------|--------------|
| C | 0.784308000  | -0.191382000 | -0.048186000 |
| C | -0.784260000 | -0.191543000 | 0.048169000  |
| O | -1.074700000 | 1.192148000  | 0.388091000  |
| O | 1.074485000  | 1.192315000  | -0.388255000 |
| B | -0.000227000 | 1.936653000  | -0.000095000 |
| H | -0.000469000 | 3.124666000  | -0.000135000 |
| C | -1.471443000 | -0.461990000 | -1.288369000 |
| H | -1.364713000 | -1.506051000 | -1.593753000 |
| H | -2.535890000 | -0.238579000 | -1.187689000 |
| H | -1.066800000 | 0.175552000  | -2.078110000 |
| C | -1.365215000 | -1.086257000 | 1.130353000  |
| H | -2.453618000 | -0.991517000 | 1.134843000  |
| H | -1.116552000 | -2.135088000 | 0.943547000  |
| H | -0.999249000 | -0.810039000 | 2.119562000  |
| C | 1.365472000  | -1.086218000 | -1.130205000 |

|   |             |              |              |
|---|-------------|--------------|--------------|
| H | 2.453840000 | -0.991106000 | -1.134854000 |
| H | 1.117199000 | -2.135083000 | -0.943050000 |
| H | 0.999311000 | -0.810452000 | -2.119470000 |
| C | 1.471504000 | -0.461543000 | 1.288425000  |
| H | 1.364299000 | -1.505434000 | 1.594173000  |
| H | 2.536053000 | -0.238682000 | 1.187594000  |
| H | 1.067246000 | 0.176450000  | 2.078010000  |

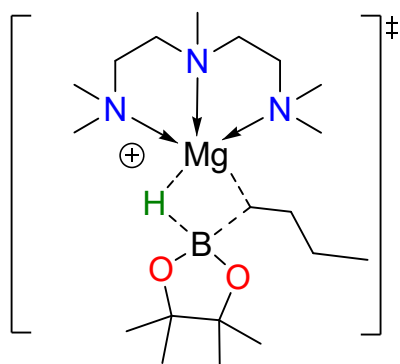

|   |             |              |              |
|---|-------------|--------------|--------------|
| C | 3.992039000 | 0.227023000  | 0.689859000  |
| H | 4.186807000 | -0.810275000 | 0.971822000  |
| H | 4.972208000 | 0.704611000  | 0.561425000  |
| C | 3.219080000 | 0.927819000  | 1.799166000  |
| H | 3.034388000 | 1.969805000  | 1.525014000  |
| H | 3.819764000 | 0.944247000  | 2.718511000  |
| C | 3.635609000 | -0.889275000 | -1.463612000 |
| H | 3.320707000 | -0.639432000 | -2.479345000 |
| H | 4.728193000 | -0.997504000 | -1.494255000 |
| C | 3.005589000 | -2.208507000 | -1.033814000 |
| H | 3.395222000 | -2.518693000 | -0.059225000 |
| H | 3.294482000 | -2.993217000 | -1.746971000 |
| C | 3.451012000 | 1.517654000  | -1.291687000 |
| H | 3.173064000 | 2.355218000  | -0.650971000 |
| H | 2.824719000 | 1.558970000  | -2.183851000 |



|   |              |              |              |
|---|--------------|--------------|--------------|
| H | 4.501158000  | 1.637519000  | -1.587199000 |
| C | 1.001544000  | 1.216433000  | 2.750912000  |
| H | 0.025746000  | 0.747359000  | 2.883301000  |
| H | 0.863940000  | 2.125378000  | 2.164155000  |
| H | 1.408130000  | 1.482505000  | 3.734707000  |
| C | 2.060520000  | -0.933323000 | 2.854691000  |
| H | 2.470699000  | -0.694205000 | 3.844392000  |
| H | 2.729984000  | -1.646391000 | 2.369766000  |
| H | 1.086578000  | -1.407455000 | 2.987252000  |
| C | 1.007611000  | -3.288790000 | -0.187223000 |
| H | -0.076555000 | -3.200201000 | -0.108133000 |
| H | 1.436437000  | -3.330133000 | 0.816352000  |
| H | 1.252312000  | -4.222463000 | -0.709904000 |
| C | 0.894081000  | -2.079557000 | -2.253021000 |
| H | 1.236331000  | -1.215482000 | -2.824778000 |
| H | -0.185688000 | -1.996724000 | -2.121793000 |
| H | 1.125508000  | -2.990738000 | -2.819808000 |
| C | -0.281875000 | 1.109454000  | -1.026478000 |
| H | 0.443195000  | 1.074985000  | -1.870430000 |
| H | -1.216244000 | 0.871514000  | -1.534710000 |
| C | -0.338782000 | 2.545510000  | -0.493913000 |
| H | -1.045172000 | 2.582655000  | 0.343711000  |
| H | 0.636469000  | 2.849634000  | -0.076792000 |
| N | 3.237953000  | 0.237812000  | -0.586939000 |
| N | 1.906026000  | 0.286590000  | 2.038716000  |
| N | 1.534838000  | -2.118436000 | -0.918365000 |
| C | -0.746797000 | 3.597333000  | -1.530218000 |
| H | -0.051197000 | 3.559913000  | -2.378739000 |
| H | -1.728227000 | 3.323983000  | -1.936789000 |
| C | -0.800009000 | 5.015128000  | -0.969797000 |

|    |              |              |              |
|----|--------------|--------------|--------------|
| H  | -1.105445000 | 5.736333000  | -1.732354000 |
| H  | -1.512632000 | 5.087727000  | -0.142192000 |
| H  | 0.178005000  | 5.332289000  | -0.591715000 |
| Mg | 1.115430000  | -0.160675000 | 0.014556000  |
| O  | -1.955279000 | -1.375957000 | -0.461009000 |
| O  | -2.221782000 | 0.390974000  | 1.003149000  |
| B  | -1.332126000 | -0.440924000 | 0.354199000  |
| C  | -3.376843000 | -1.050582000 | -0.491007000 |
| C  | -3.549282000 | -0.173204000 | 0.808294000  |
| H  | -0.382737000 | -0.893114000 | 1.004083000  |
| C  | -4.547308000 | 0.965643000  | 0.682492000  |
| H  | -5.552421000 | 0.581005000  | 0.488099000  |
| H  | -4.578743000 | 1.527524000  | 1.618751000  |
| H  | -4.277698000 | 1.656117000  | -0.116743000 |
| C  | -3.680348000 | -0.295861000 | -1.782739000 |
| H  | -3.333794000 | -0.888397000 | -2.632893000 |
| H  | -4.755407000 | -0.138101000 | -1.898997000 |
| H  | -3.192230000 | 0.678737000  | -1.822010000 |
| C  | -4.150680000 | -2.360313000 | -0.480436000 |
| H  | -5.226441000 | -2.174918000 | -0.416514000 |
| H  | -3.960986000 | -2.905202000 | -1.408457000 |
| H  | -3.857199000 | -2.997809000 | 0.353793000  |
| C  | -3.857001000 | -1.001941000 | 2.054124000  |
| H  | -3.782701000 | -0.357200000 | 2.932735000  |
| H  | -4.865740000 | -1.420484000 | 2.023793000  |
| H  | -3.145501000 | -1.822952000 | 2.173687000  |

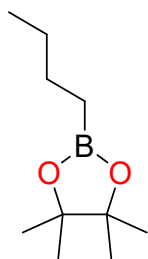

|   |              |              |              |
|---|--------------|--------------|--------------|
| C | -1.592283000 | 0.881315000  | 0.041763000  |
| C | -2.078360000 | -0.610306000 | -0.027043000 |
| O | -0.868870000 | -1.309434000 | -0.411790000 |
| O | -0.183603000 | 0.730358000  | 0.349163000  |
| B | 0.198708000  | -0.526796000 | -0.046345000 |
| C | -2.496506000 | -1.168847000 | 1.331969000  |
| H | -3.444878000 | -0.743627000 | 1.670704000  |
| H | -2.614870000 | -2.251403000 | 1.245417000  |
| H | -1.735906000 | -0.972287000 | 2.091662000  |
| C | -3.153104000 | -0.893261000 | -1.064030000 |
| H | -3.398755000 | -1.957901000 | -1.052120000 |
| H | -4.066091000 | -0.332018000 | -0.843746000 |
| H | -2.817848000 | -0.636907000 | -2.069431000 |
| C | -2.238975000 | 1.723491000  | 1.129385000  |
| H | -1.814008000 | 2.729992000  | 1.111548000  |
| H | -3.317800000 | 1.807934000  | 0.968012000  |
| H | -2.064679000 | 1.302417000  | 2.119984000  |
| C | -1.672172000 | 1.602591000  | -1.302242000 |
| H | -2.705372000 | 1.823322000  | -1.582783000 |
| H | -1.125735000 | 2.545620000  | -1.228006000 |
| H | -1.214516000 | 1.008880000  | -2.097334000 |
| C | 1.681649000  | -1.026638000 | -0.062638000 |
| H | 1.813194000  | -1.692007000 | 0.804332000  |
| H | 1.822153000  | -1.680811000 | -0.933128000 |
| C | 2.751046000  | 0.068389000  | -0.033080000 |

|   |             |              |              |
|---|-------------|--------------|--------------|
| H | 2.641418000 | 0.712752000  | -0.914696000 |
| H | 2.579146000 | 0.722247000  | 0.830243000  |
| C | 4.178844000 | -0.471995000 | 0.016544000  |
| H | 4.346690000 | -1.127552000 | -0.847718000 |
| H | 4.290677000 | -1.109519000 | 0.903183000  |
| C | 5.238888000 | 0.624865000  | 0.039482000  |
| H | 6.249544000 | 0.207946000  | 0.078354000  |
| H | 5.174820000 | 1.255696000  | -0.853296000 |
| H | 5.114883000 | 1.276193000  | 0.910907000  |

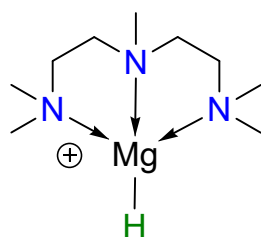

|   |              |              |              |
|---|--------------|--------------|--------------|
| C | 1.042143000  | 1.344815000  | -1.039862000 |
| H | 0.648227000  | 0.780117000  | -1.888030000 |
| H | 1.348957000  | 2.322953000  | -1.431730000 |
| C | 2.249665000  | 0.624202000  | -0.453326000 |
| H | 2.642554000  | 1.188770000  | 0.396752000  |
| H | 3.054472000  | 0.575763000  | -1.198767000 |
| C | -1.375364000 | 1.574775000  | -0.664915000 |
| H | -2.056764000 | 2.023634000  | 0.061316000  |
| H | -1.366656000 | 2.242893000  | -1.536252000 |
| C | -1.888927000 | 0.201883000  | -1.085766000 |
| H | -1.272298000 | -0.204294000 | -1.893222000 |
| H | -2.904166000 | 0.307526000  | -1.492506000 |
| C | 0.201332000  | 2.704345000  | 0.795900000  |
| H | 1.192818000  | 2.660406000  | 1.248782000  |
| H | -0.530497000 | 2.748011000  | 1.604388000  |

|    |              |              |              |
|----|--------------|--------------|--------------|
| H  | 0.130597000  | 3.621377000  | 0.197998000  |
| C  | 2.914648000  | -1.200925000 | 1.005238000  |
| H  | 2.656281000  | -2.203902000 | 1.348459000  |
| H  | 2.929748000  | -0.541060000 | 1.874505000  |
| H  | 3.913443000  | -1.228330000 | 0.552638000  |
| C  | 1.838859000  | -1.690591000 | -1.089764000 |
| H  | 2.816713000  | -1.790491000 | -1.577846000 |
| H  | 1.114652000  | -1.365886000 | -1.839043000 |
| H  | 1.538866000  | -2.672865000 | -0.719638000 |
| C  | -2.049755000 | -2.145139000 | -0.496369000 |
| H  | -2.000406000 | -2.859577000 | 0.327601000  |
| H  | -1.264806000 | -2.382963000 | -1.217051000 |
| H  | -3.022157000 | -2.256375000 | -0.992290000 |
| C  | -2.938010000 | -0.494546000 | 1.006772000  |
| H  | -2.816083000 | 0.497965000  | 1.443904000  |
| H  | -2.884286000 | -1.219422000 | 1.820036000  |
| H  | -3.926358000 | -0.554237000 | 0.533988000  |
| N  | -0.036494000 | 1.504220000  | -0.032953000 |
| N  | 1.901466000  | -0.734173000 | 0.031615000  |
| N  | -1.866339000 | -0.776684000 | 0.025005000  |
| Mg | 0.007197000  | -0.379381000 | 1.126746000  |
| H  | 0.012813000  | -0.603879000 | 2.821936000  |

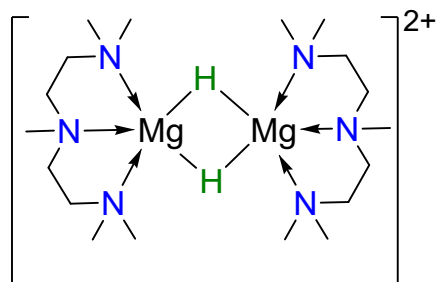

|   |              |             |             |
|---|--------------|-------------|-------------|
| C | -4.181285000 | 0.641785000 | 1.062965000 |
|---|--------------|-------------|-------------|

|   |              |              |              |
|---|--------------|--------------|--------------|
| H | -4.808664000 | 0.441067000  | 0.192404000  |
| H | -4.856453000 | 0.671416000  | 1.927263000  |
| C | -3.495015000 | 1.987774000  | 0.910838000  |
| H | -2.878957000 | 2.193802000  | 1.790756000  |
| H | -4.247545000 | 2.785312000  | 0.853726000  |
| C | -3.400258000 | 2.170396000  | -1.517171000 |
| H | -4.098226000 | 1.340477000  | -1.629148000 |
| H | -2.733883000 | 2.183492000  | -2.381515000 |
| H | -3.977551000 | 3.103207000  | -1.509071000 |
| C | -1.727537000 | 3.213409000  | -0.168797000 |
| H | -2.314131000 | 4.138036000  | -0.101438000 |
| H | -1.090603000 | 3.275166000  | -1.052369000 |
| H | -1.106632000 | 3.128923000  | 0.725343000  |
| C | -3.752318000 | -1.735825000 | 0.708492000  |
| H | -3.159564000 | -2.547666000 | 1.137397000  |
| H | -4.780955000 | -1.887923000 | 1.060819000  |
| C | -3.720047000 | -1.803353000 | -0.811515000 |
| H | -4.387266000 | -1.051660000 | -1.241702000 |
| H | -4.101194000 | -2.778300000 | -1.143311000 |
| C | -1.519366000 | -2.755004000 | -1.176530000 |
| H | -1.463013000 | -3.042329000 | -0.125106000 |
| H | -0.513375000 | -2.539344000 | -1.541591000 |
| H | -1.921628000 | -3.604703000 | -1.742707000 |
| C | -2.429288000 | -1.249634000 | -2.791223000 |
| H | -1.426756000 | -1.025870000 | -3.159614000 |
| H | -3.067006000 | -0.381882000 | -2.964100000 |
| H | -2.835723000 | -2.095929000 | -3.358636000 |
| N | -2.605066000 | 2.031819000  | -0.277977000 |
| N | -2.361792000 | -1.556208000 | -1.347530000 |
| C | -2.822981000 | -0.600950000 | 2.635063000  |

|    |              |              |              |
|----|--------------|--------------|--------------|
| H  | -2.048830000 | -1.362229000 | 2.740401000  |
| H  | -3.687566000 | -0.887386000 | 3.246509000  |
| H  | -2.418987000 | 0.338003000  | 3.014956000  |
| N  | -3.196776000 | -0.459024000 | 1.213399000  |
| Mg | -1.454614000 | 0.117431000  | -0.128192000 |
| H  | -0.109379000 | 0.306406000  | 1.229874000  |
| C  | 4.065671000  | -1.402191000 | -0.422515000 |
| H  | 4.721441000  | -0.856280000 | 0.258504000  |
| H  | 4.723737000  | -1.968911000 | -1.093069000 |
| C  | 3.188638000  | -2.363052000 | 0.362088000  |
| H  | 2.573784000  | -2.952370000 | -0.324285000 |
| H  | 3.817256000  | -3.074760000 | 0.913657000  |
| C  | 2.998844000  | -1.169378000 | 2.478278000  |
| H  | 3.820943000  | -0.509568000 | 2.198696000  |
| H  | 2.312856000  | -0.618752000 | 3.124967000  |
| H  | 3.415690000  | -2.009507000 | 3.047803000  |
| C  | 1.214954000  | -2.568524000 | 1.737232000  |
| H  | 1.637359000  | -3.419464000 | 2.286208000  |
| H  | 0.527407000  | -2.032784000 | 2.392915000  |
| H  | 0.664258000  | -2.953831000 | 0.877431000  |
| C  | 4.001059000  | 0.831557000  | -1.403124000 |
| H  | 3.531776000  | 1.361779000  | -2.235127000 |
| H  | 5.035799000  | 0.629965000  | -1.709810000 |
| C  | 4.001589000  | 1.700668000  | -0.155650000 |
| H  | 4.524021000  | 1.197234000  | 0.662430000  |
| H  | 4.558569000  | 2.625935000  | -0.354369000 |
| C  | 2.022675000  | 3.029120000  | -0.576685000 |
| H  | 1.884804000  | 2.637669000  | -1.585712000 |
| H  | 1.048911000  | 3.314016000  | -0.182238000 |
| H  | 2.650396000  | 3.927531000  | -0.628634000 |

|    |             |              |              |
|----|-------------|--------------|--------------|
| C  | 2.684177000 | 2.567121000  | 1.680338000  |
| H  | 1.672515000 | 2.764835000  | 2.038237000  |
| H  | 3.157353000 | 1.854218000  | 2.356853000  |
| H  | 3.256374000 | 3.502440000  | 1.706888000  |
| N  | 2.272975000 | -1.647600000 | 1.282738000  |
| N  | 2.628157000 | 2.012960000  | 0.310359000  |
| C  | 2.874222000 | -1.007468000 | -2.496601000 |
| H  | 2.183799000 | -0.338418000 | -3.011827000 |
| H  | 3.755772000 | -1.173857000 | -3.127903000 |
| H  | 2.370568000 | -1.964727000 | -2.352325000 |
| N  | 3.252400000 | -0.428867000 | -1.191449000 |
| Mg | 1.463784000 | 0.105899000  | 0.108918000  |
| H  | 0.126787000 | 0.087279000  | -1.256828000 |

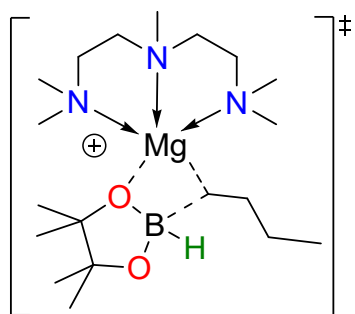

|   |              |              |              |
|---|--------------|--------------|--------------|
| C | -3.191273000 | -0.822146000 | 1.490109000  |
| H | -3.861254000 | 0.006650000  | 1.254395000  |
| H | -3.821795000 | -1.620272000 | 1.904479000  |
| C | -2.174373000 | -0.382097000 | 2.529358000  |
| H | -1.512523000 | -1.215358000 | 2.781326000  |
| H | -2.690281000 | -0.095734000 | 3.456663000  |
| C | -3.448147000 | -1.153942000 | -0.910756000 |
| H | -3.048687000 | -1.777200000 | -1.714480000 |
| H | -4.439896000 | -1.560046000 | -0.666353000 |
| C | -3.587224000 | 0.280377000  | -1.384009000 |



|   |              |              |              |
|---|--------------|--------------|--------------|
| H | -4.051419000 | 0.896436000  | -0.608309000 |
| H | -4.266590000 | 0.311965000  | -2.248166000 |
| C | -2.150392000 | -2.693833000 | 0.385061000  |
| H | -1.564212000 | -2.836792000 | 1.291656000  |
| H | -1.541875000 | -2.998753000 | -0.466186000 |
| H | -3.038773000 | -3.336758000 | 0.444039000  |
| C | -0.144465000 | 0.875644000  | 2.897213000  |
| H | 0.485733000  | 1.678318000  | 2.513759000  |
| H | 0.433515000  | -0.049621000 | 2.902793000  |
| H | -0.432878000 | 1.112842000  | 3.929674000  |
| C | -2.079125000 | 1.999106000  | 2.064040000  |
| H | -2.388946000 | 2.247800000  | 3.087758000  |
| H | -2.972429000 | 1.943977000  | 1.440188000  |
| H | -1.445323000 | 2.802994000  | 1.687311000  |
| C | -2.454336000 | 2.346097000  | -1.844110000 |
| H | -1.502660000 | 2.806329000  | -2.105322000 |
| H | -2.794376000 | 2.768547000  | -0.896654000 |
| H | -3.193151000 | 2.590446000  | -2.619224000 |
| C | -1.805147000 | 0.369673000  | -3.019742000 |
| H | -1.624271000 | -0.705526000 | -2.974825000 |
| H | -0.865297000 | 0.856505000  | -3.276767000 |
| H | -2.538522000 | 0.570228000  | -3.812597000 |
| C | 0.676888000  | 1.826226000  | -0.594726000 |
| H | 0.619425000  | 2.100231000  | -1.657249000 |
| H | -0.136010000 | 2.443708000  | -0.146457000 |
| C | 1.981045000  | 2.406021000  | -0.035721000 |
| H | 2.060901000  | 2.212624000  | 1.043621000  |
| H | 2.835935000  | 1.888236000  | -0.483006000 |
| N | -2.532112000 | -1.277484000 | 0.244355000  |
| N | -1.331839000 | 0.726603000  | 2.033850000  |

|    |              |              |              |
|----|--------------|--------------|--------------|
| N  | -2.284416000 | 0.884835000  | -1.719897000 |
| C  | 2.149354000  | 3.911325000  | -0.264181000 |
| H  | 2.085438000  | 4.113420000  | -1.340838000 |
| H  | 1.304642000  | 4.445676000  | 0.192066000  |
| C  | 3.461226000  | 4.466139000  | 0.282944000  |
| H  | 3.551191000  | 5.540108000  | 0.098992000  |
| H  | 3.540981000  | 4.309386000  | 1.364008000  |
| H  | 4.321980000  | 3.978165000  | -0.185021000 |
| Mg | -0.747638000 | 0.205764000  | -0.101423000 |
| O  | 0.709653000  | -1.271859000 | -0.525309000 |
| O  | 2.774967000  | -0.493294000 | -1.207823000 |
| B  | 1.431315000  | -0.362750000 | -1.396643000 |
| C  | 1.715152000  | -2.266317000 | -0.091133000 |
| C  | 3.034316000  | -1.421127000 | -0.131031000 |
| H  | 0.994252000  | -0.049558000 | -2.455898000 |
| C  | 1.691019000  | -3.381669000 | -1.130786000 |
| H  | 2.383050000  | -4.183566000 | -0.864696000 |
| H  | 0.687465000  | -3.810322000 | -1.185640000 |
| H  | 1.959032000  | -3.009286000 | -2.121677000 |
| C  | 4.275384000  | -2.222181000 | -0.494683000 |
| H  | 5.140736000  | -1.556616000 | -0.507883000 |
| H  | 4.466709000  | -3.008401000 | 0.241387000  |
| H  | 4.188014000  | -2.675051000 | -1.482201000 |
| C  | 3.282418000  | -0.628447000 | 1.147797000  |
| H  | 3.558215000  | -1.283252000 | 1.978079000  |
| H  | 4.106772000  | 0.065905000  | 0.977393000  |
| H  | 2.408946000  | -0.038966000 | 1.430503000  |
| C  | 1.377435000  | -2.815433000 | 1.281208000  |
| H  | 0.508400000  | -3.473528000 | 1.236955000  |
| H  | 2.213916000  | -3.415054000 | 1.650043000  |

|   |             |              |             |
|---|-------------|--------------|-------------|
| H | 1.194064000 | -2.023188000 | 2.008429000 |
|---|-------------|--------------|-------------|

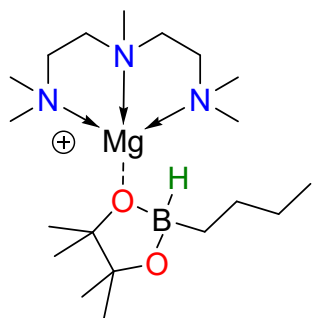

|   |              |              |              |
|---|--------------|--------------|--------------|
| C | -3.663203000 | 0.494008000  | 1.048432000  |
| H | -3.884604000 | 1.479585000  | 0.634969000  |
| H | -4.621370000 | 0.075306000  | 1.381375000  |
| C | -2.724096000 | 0.631112000  | 2.233621000  |
| H | -2.485273000 | -0.356397000 | 2.638379000  |
| H | -3.221153000 | 1.190822000  | 3.037704000  |
| C | -3.647343000 | 0.006908000  | -1.344032000 |
| H | -3.433823000 | -0.816702000 | -2.029597000 |
| H | -4.741074000 | 0.089622000  | -1.287406000 |
| C | -3.062719000 | 1.302934000  | -1.884906000 |
| H | -3.358315000 | 2.149108000  | -1.258131000 |
| H | -3.478573000 | 1.499006000  | -2.882777000 |
| C | -3.384159000 | -1.773597000 | 0.259042000  |
| H | -2.986762000 | -2.062273000 | 1.232057000  |
| H | -2.924862000 | -2.409934000 | -0.498228000 |
| H | -4.467237000 | -1.950425000 | 0.255451000  |
| C | -0.464489000 | 1.038733000  | 2.948328000  |
| H | 0.464027000  | 1.563270000  | 2.728069000  |
| H | -0.241947000 | -0.025465000 | 3.009971000  |
| H | -0.858046000 | 1.396202000  | 3.908132000  |
| C | -1.626155000 | 2.741894000  | 1.726085000  |
| H | -1.948827000 | 3.188607000  | 2.675256000  |

|    |              |              |              |
|----|--------------|--------------|--------------|
| H  | -2.374863000 | 2.975288000  | 0.967198000  |
| H  | -0.680143000 | 3.200108000  | 1.432914000  |
| C  | -1.035975000 | 2.623270000  | -2.058013000 |
| H  | 0.053786000  | 2.571357000  | -2.043236000 |
| H  | -1.369486000 | 3.252714000  | -1.230963000 |
| H  | -1.355873000 | 3.087047000  | -2.999693000 |
| C  | -1.116953000 | 0.461119000  | -3.072184000 |
| H  | -1.524448000 | -0.550499000 | -3.038533000 |
| H  | -0.028930000 | 0.391783000  | -3.042382000 |
| H  | -1.423186000 | 0.927070000  | -4.017501000 |
| C  | 2.485909000  | 0.896989000  | 0.680400000  |
| H  | 1.870273000  | 1.668689000  | 1.169956000  |
| H  | 3.037499000  | 0.398775000  | 1.489290000  |
| C  | 3.486730000  | 1.602076000  | -0.242502000 |
| H  | 4.110702000  | 0.845496000  | -0.731995000 |
| H  | 2.945712000  | 2.108464000  | -1.055954000 |
| N  | -3.079821000 | -0.355963000 | -0.022390000 |
| N  | -1.445088000 | 1.282840000  | 1.864298000  |
| N  | -1.588286000 | 1.261089000  | -1.920666000 |
| C  | 4.382612000  | 2.619707000  | 0.462560000  |
| H  | 3.756074000  | 3.377422000  | 0.952532000  |
| H  | 4.929111000  | 2.115244000  | 1.269216000  |
| C  | 5.373489000  | 3.304543000  | -0.473423000 |
| H  | 6.002141000  | 4.021605000  | 0.061564000  |
| H  | 6.035802000  | 2.574704000  | -0.949395000 |
| H  | 4.856845000  | 3.848565000  | -1.271272000 |
| Mg | -0.884790000 | 0.235591000  | -0.030935000 |
| O  | 0.516007000  | -0.989887000 | 0.683635000  |
| O  | 2.290485000  | -1.147516000 | -0.854416000 |
| B  | 1.575722000  | -0.154358000 | -0.116625000 |

|   |              |              |              |
|---|--------------|--------------|--------------|
| C | 1.021083000  | -2.353356000 | 0.699724000  |
| C | 1.724975000  | -2.440282000 | -0.696919000 |
| H | 0.786846000  | 0.578506000  | -0.875158000 |
| C | 0.732768000  | -2.701870000 | -1.835320000 |
| H | 1.237130000  | -2.514019000 | -2.785352000 |
| H | 0.365231000  | -3.731480000 | -1.839548000 |
| H | -0.132564000 | -2.031700000 | -1.782070000 |
| C | 2.846390000  | -3.469425000 | -0.764804000 |
| H | 3.278606000  | -3.467935000 | -1.768023000 |
| H | 3.643190000  | -3.228112000 | -0.061311000 |
| H | 2.479621000  | -4.478924000 | -0.555592000 |
| C | -0.125278000 | -3.328339000 | 0.900319000  |
| H | -0.580021000 | -3.186662000 | 1.885230000  |
| H | -0.895572000 | -3.222247000 | 0.135660000  |
| H | 0.243786000  | -4.356411000 | 0.858146000  |
| C | 2.006210000  | -2.477577000 | 1.859690000  |
| H | 2.348760000  | -3.508504000 | 1.973978000  |
| H | 2.877620000  | -1.839737000 | 1.712166000  |
| H | 1.514694000  | -2.181870000 | 2.790223000  |

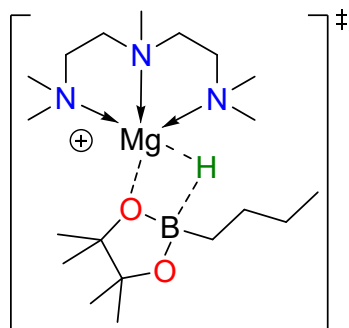

|   |              |              |              |
|---|--------------|--------------|--------------|
| C | -3.573055000 | -0.801099000 | -1.077901000 |
| H | -3.716004000 | -1.588082000 | -0.335170000 |
| H | -4.563873000 | -0.584232000 | -1.501946000 |

|   |              |              |              |
|---|--------------|--------------|--------------|
| C | -2.647754000 | -1.303713000 | -2.168289000 |
| H | -2.489147000 | -0.524980000 | -2.917242000 |
| H | -3.119073000 | -2.146828000 | -2.691554000 |
| C | -3.784847000 | 0.663736000  | 0.849808000  |
| H | -3.464697000 | 1.642094000  | 1.218516000  |
| H | -4.861419000 | 0.744513000  | 0.640647000  |
| C | -3.552772000 | -0.396385000 | 1.914563000  |
| H | -4.012699000 | -1.343785000 | 1.623616000  |
| H | -4.058626000 | -0.088077000 | 2.840699000  |
| C | -3.191833000 | 1.569179000  | -1.283750000 |
| H | -2.582714000 | 1.465974000  | -2.181740000 |
| H | -2.874809000 | 2.470160000  | -0.760920000 |
| H | -4.240653000 | 1.694480000  | -1.585188000 |
| C | -0.347683000 | -1.655203000 | -2.741864000 |
| H | 0.613362000  | -2.038741000 | -2.406473000 |
| H | -0.208616000 | -0.626247000 | -3.075677000 |
| H | -0.692413000 | -2.266188000 | -3.586372000 |
| C | -1.373378000 | -3.074579000 | -1.099545000 |
| H | -1.575918000 | -3.801414000 | -1.896956000 |
| H | -2.156688000 | -3.166897000 | -0.344583000 |
| H | -0.418918000 | -3.318028000 | -0.629574000 |
| C | -1.869615000 | -1.953397000 | 2.715434000  |
| H | -0.791619000 | -2.112897000 | 2.773254000  |
| H | -2.302767000 | -2.731639000 | 2.082865000  |
| H | -2.307392000 | -2.037992000 | 3.719260000  |
| C | -1.554881000 | 0.389410000  | 3.034233000  |
| H | -1.733848000 | 1.396183000  | 2.648126000  |
| H | -0.478231000 | 0.230614000  | 3.114065000  |
| H | -2.004950000 | 0.321203000  | 4.034190000  |
| C | 2.520602000  | -1.128183000 | -0.609053000 |

|    |              |              |              |
|----|--------------|--------------|--------------|
| H  | 1.741275000  | -1.869114000 | -0.801132000 |
| H  | 3.039184000  | -0.965953000 | -1.569273000 |
| C  | 3.516888000  | -1.705197000 | 0.402942000  |
| H  | 4.299817000  | -0.965605000 | 0.602827000  |
| H  | 2.999151000  | -1.864700000 | 1.356726000  |
| N  | -3.031867000 | 0.399737000  | -0.399864000 |
| N  | -1.325492000 | -1.698161000 | -1.634459000 |
| N  | -2.118210000 | -0.626591000 | 2.129299000  |
| C  | 4.157592000  | -3.014465000 | -0.053843000 |
| H  | 3.370176000  | -3.754783000 | -0.249397000 |
| H  | 4.665633000  | -2.853301000 | -1.013341000 |
| C  | 5.148187000  | -3.581716000 | 0.957813000  |
| H  | 5.590446000  | -4.516961000 | 0.604302000  |
| H  | 5.966197000  | -2.879466000 | 1.146163000  |
| H  | 4.662343000  | -3.786241000 | 1.917270000  |
| Mg | -0.856498000 | -0.349734000 | 0.156153000  |
| O  | 0.734149000  | 0.912054000  | -0.693844000 |
| O  | 2.718890000  | 1.171631000  | 0.435510000  |
| B  | 1.919866000  | 0.253833000  | -0.177795000 |
| C  | 1.089344000  | 2.345419000  | -0.756089000 |
| C  | 2.101390000  | 2.473318000  | 0.429024000  |
| H  | 0.512442000  | -0.891511000 | 1.140302000  |
| C  | 3.185762000  | 3.518127000  | 0.216539000  |
| H  | 2.754499000  | 4.518563000  | 0.118349000  |
| H  | 3.854803000  | 3.523754000  | 1.079331000  |
| H  | 3.784624000  | 3.303848000  | -0.668661000 |
| C  | 1.730291000  | 2.573849000  | -2.121190000 |
| H  | 1.029923000  | 2.276455000  | -2.905456000 |
| H  | 1.977492000  | 3.627124000  | -2.271008000 |
| H  | 2.643953000  | 1.987437000  | -2.238649000 |

|   |              |             |              |
|---|--------------|-------------|--------------|
| C | -0.148540000 | 3.205340000 | -0.610136000 |
| H | 0.140373000  | 4.256248000 | -0.524585000 |
| H | -0.784638000 | 3.115010000 | -1.492167000 |
| H | -0.724192000 | 2.948947000 | 0.282230000  |
| C | 1.435563000  | 2.673518000 | 1.786307000  |
| H | 2.191088000  | 2.552603000 | 2.565013000  |
| H | 1.000509000  | 3.671084000 | 1.885298000  |
| H | 0.662344000  | 1.922887000 | 1.960988000  |

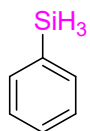

|    |              |              |              |
|----|--------------|--------------|--------------|
| C  | -0.464506000 | 0.000034000  | -0.013739000 |
| C  | 0.256222000  | -1.201680000 | -0.010429000 |
| C  | 0.256232000  | 1.201670000  | -0.010450000 |
| C  | 1.647082000  | -1.203663000 | 0.003329000  |
| H  | -0.272279000 | -2.150926000 | -0.023579000 |
| C  | 1.647159000  | 1.203614000  | 0.003339000  |
| H  | -0.272272000 | 2.150901000  | -0.023578000 |
| C  | 2.344646000  | -0.000011000 | 0.011083000  |
| H  | 2.187063000  | -2.145041000 | 0.004138000  |
| H  | 2.187121000  | 2.145001000  | 0.004149000  |
| H  | 3.429793000  | -0.000062000 | 0.019176000  |
| Si | -2.342443000 | 0.000011000  | 0.006301000  |
| H  | -2.856592000 | -1.211528000 | -0.691001000 |
| H  | -2.873887000 | -0.008838000 | 1.399389000  |
| H  | -2.855761000 | 1.220556000  | -0.675706000 |



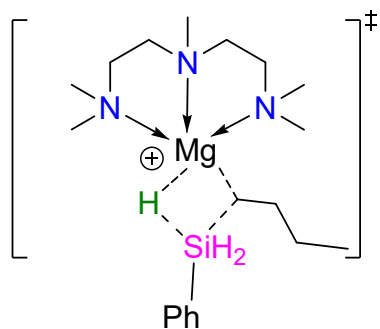

|   |             |              |              |
|---|-------------|--------------|--------------|
| C | 3.615837000 | -1.304565000 | 0.565665000  |
| H | 3.268542000 | -2.315896000 | 0.789667000  |
| H | 4.702049000 | -1.372521000 | 0.422359000  |
| C | 3.307166000 | -0.381685000 | 1.736760000  |
| H | 3.663866000 | 0.628787000  | 1.521113000  |
| H | 3.845018000 | -0.721815000 | 2.631506000  |
| C | 2.763360000 | -1.957313000 | -1.636999000 |
| H | 2.602057000 | -1.517392000 | -2.623950000 |
| H | 3.671823000 | -2.569581000 | -1.714063000 |
| C | 1.583278000 | -2.842368000 | -1.261543000 |
| H | 1.778563000 | -3.361139000 | -0.318186000 |
| H | 1.460632000 | -3.623656000 | -2.024120000 |
| C | 3.776474000 | 0.210546000  | -1.318736000 |
| H | 3.958578000 | 1.029011000  | -0.621601000 |
| H | 3.251172000 | 0.619624000  | -2.182471000 |
| H | 4.744484000 | -0.190361000 | -1.645019000 |
| C | 1.528026000 | 0.924035000  | 2.758345000  |
| H | 0.450176000 | 0.976525000  | 2.918816000  |
| H | 1.836407000 | 1.807823000  | 2.197237000  |
| H | 2.032766000 | 0.926797000  | 3.732290000  |
| C | 1.387538000 | -1.472112000 | 2.766961000  |
| H | 1.849848000 | -1.494350000 | 3.761861000  |
| H | 1.638824000 | -2.401668000 | 2.252454000  |

|    |              |              |              |
|----|--------------|--------------|--------------|
| H  | 0.303711000  | -1.423334000 | 2.884769000  |
| C  | -0.675223000 | -2.889139000 | -0.386444000 |
| H  | -1.588134000 | -2.308409000 | -0.245857000 |
| H  | -0.295590000 | -3.183772000 | 0.594117000  |
| H  | -0.912569000 | -3.796274000 | -0.956202000 |
| C  | -0.224119000 | -1.680110000 | -2.409164000 |
| H  | 0.476232000  | -1.051375000 | -2.961365000 |
| H  | -1.146785000 | -1.115977000 | -2.261914000 |
| H  | -0.450541000 | -2.567959000 | -3.013111000 |
| C  | 0.553387000  | 1.737973000  | -0.930718000 |
| H  | 1.531594000  | 1.732168000  | -0.388699000 |
| H  | 0.753431000  | 1.249143000  | -1.902091000 |
| C  | 0.311093000  | 3.232883000  | -1.205279000 |
| H  | 0.880899000  | 3.553802000  | -2.085843000 |
| H  | -0.743712000 | 3.387218000  | -1.471195000 |
| N  | 2.956988000  | -0.840424000 | -0.680857000 |
| N  | 1.851104000  | -0.301202000 | 1.995495000  |
| N  | 0.333003000  | -2.069976000 | -1.094668000 |
| C  | 0.678050000  | 4.141932000  | -0.032513000 |
| H  | 0.148920000  | 3.809454000  | 0.868126000  |
| H  | 1.751716000  | 4.037564000  | 0.179110000  |
| C  | 0.357680000  | 5.609326000  | -0.297514000 |
| H  | 0.650330000  | 6.239258000  | 0.546409000  |
| H  | 0.883633000  | 5.977314000  | -1.183866000 |
| H  | -0.713631000 | 5.754974000  | -0.463710000 |
| Mg | 0.896496000  | -0.234865000 | 0.009130000  |
| H  | -0.792810000 | -0.028168000 | 0.732629000  |
| Si | -1.498023000 | 1.136429000  | -0.162756000 |
| H  | -1.818588000 | 1.508920000  | -1.591244000 |
| H  | -1.512535000 | 2.284207000  | 0.781071000  |

|   |              |              |              |
|---|--------------|--------------|--------------|
| C | -3.134539000 | 0.164046000  | 0.119180000  |
| C | -3.389239000 | -0.579427000 | 1.278572000  |
| C | -4.150342000 | 0.235825000  | -0.840864000 |
| C | -4.610527000 | -1.212463000 | 1.483624000  |
| H | -2.619736000 | -0.658519000 | 2.046212000  |
| C | -5.375575000 | -0.399629000 | -0.649988000 |
| H | -3.983374000 | 0.805440000  | -1.752876000 |
| C | -5.607249000 | -1.124057000 | 0.514063000  |
| H | -4.791034000 | -1.771586000 | 2.396539000  |
| H | -6.149318000 | -0.328241000 | -1.407784000 |
| H | -6.560654000 | -1.618641000 | 0.667649000  |

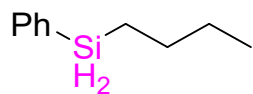

|   |              |              |              |
|---|--------------|--------------|--------------|
| C | -1.486945000 | 0.001397000  | -0.270302000 |
| H | -1.312117000 | 0.879906000  | -0.904775000 |
| H | -1.312198000 | -0.871131000 | -0.913006000 |
| C | -2.932442000 | -0.000931000 | 0.240180000  |
| H | -3.098722000 | -0.879496000 | 0.877229000  |
| H | -3.098857000 | 0.872109000  | 0.884740000  |
| C | -3.973263000 | 0.003774000  | -0.880221000 |
| H | -3.810201000 | 0.882789000  | -1.516348000 |
| H | -3.810108000 | -0.869810000 | -1.523761000 |
| C | -5.409780000 | 0.001522000  | -0.366769000 |
| H | -5.610712000 | 0.881827000  | 0.252495000  |
| H | -6.129626000 | 0.004958000  | -1.190242000 |
| H | -5.610605000 | -0.884007000 | 0.245038000  |
| C | 1.567218000  | -0.001827000 | 0.394733000  |
| C | 2.231397000  | 1.200408000  | 0.114867000  |

|    |              |              |              |
|----|--------------|--------------|--------------|
| C  | 2.232734000  | -1.201316000 | 0.106420000  |
| C  | 3.507465000  | 1.205740000  | -0.438951000 |
| H  | 1.749814000  | 2.148801000  | 0.338118000  |
| C  | 3.508813000  | -1.201311000 | -0.447423000 |
| H  | 1.752196000  | -2.151784000 | 0.322984000  |
| C  | 4.147914000  | 0.003550000  | -0.722250000 |
| H  | 4.004498000  | 2.148320000  | -0.645489000 |
| H  | 4.006897000  | -2.141858000 | -0.660593000 |
| H  | 5.144607000  | 0.005618000  | -1.151686000 |
| Si | -0.179529000 | -0.005238000 | 1.093461000  |
| H  | -0.355124000 | 1.202681000  | 1.953573000  |
| H  | -0.355005000 | -1.221624000 | 1.941573000  |

## 5. References

1. W. L. F. Armarego, C. Li Lin Chai, Purification of laboratory chemicals, Seventh Edition, **2012**.
2. C. Zuccaccia, G. Bellachioma, G. Cardaci, A. Macchioni, *J. Am. Chem. Soc.* **2001**, 123, 11020-11028.
3. L. Huck, A. de la Hoz, A. Díaz-Ortiz, J. Alcázar, *Org. Lett.* **2017**, 19, 3747–3750.
4. Bruker APEX3 software package (version 2016.9-0): Bruker AXS, 2016.
5. SAINT; part of Bruker APEX3 software package (version 2016.9-0): Bruker AXS, **2016**.
6. SADABS; part of Bruker APEX3 software package (version 2016.9-0): Bruker AXS, **2016**.
7. G. M. Sheldrick, *Acta Cryst.*, **2015**, C71, 3-8.
8. L. J. Farrugia, *J. Appl. Cryst.*, **2012**, 45, 849-854.
9. Gaussian 16, Revision C.01, M. J. Frisch, G. W. Trucks, H. B. Schlegel, G. E. Scuseria, M. A. Robb, J. R. Cheeseman, G. Scalmani, V. Barone, G. A. Petersson, H. Nakatsuji, X. Li, M. Caricato, A. V. Marenich, J. Bloino, B. G. Janesko, R. Gomperts, B. Mennucci, H. P. Hratchian, J. V. Ortiz, A. F. Izmaylov, J. L. Sonnenberg, D. Williams-Young, F. Ding, F. Lipparini, F. Egidi, J. Goings, B. Peng, A. Petrone, T. Henderson, D. Ranasinghe, V. G. Zakrzewski, J. Gao, N. Rega, G. Zheng, W. Liang, M. Hada, M. Ehara, K. Toyota, R. Fukuda, J. Hasegawa, M. Ishida, T. Nakajima, Y. Honda, O. Kitao, H. Nakai, T. Vreven, K. Throssell, J. A. Montgomery, Jr., J. E. Peralta, F. Ogliaro, M. J. Bearpark, J. J. Heyd, E. N. Brothers, K. N. Kudin, V. N. Staroverov, T. A. Keith, R. Kobayashi, J. Normand, K. Raghavachari, A. P. Rendell, J. C. Burant, S. S. Iyengar, J. Tomasi, M. Cossi, J. M. Millam, M. Klene, C. Adamo, R. Cammi, J. W. Ochterski, R. L. Martin, K. Morokuma, O. Farkas, J. B. Foresman, and D. J. Fox, Gaussian, Inc., Wallingford CT, 2016.
10. Becke, A. D. *J. Chem. Phys.* 1993, 98, 5648.
11. Perdew, J. P.; Wang, Y. *Phys. Rev. B* 1992, 45, 13244.
12. (a) McLean, A. D.; Chandler, G. S. *J. Chem. Phys.* 1980, 72, 5639. (b) Hehre, W. J.; Ditchfield, R.; Pople, J. A. *J. Chem. Phys.* 1972, 56, 2257.
13. (a) Gonzalez, C.; Schlegel, H. B. *J. Chem. Phys.* 1989, 90, 2154. (b) Gonzalez, C.; Schlegel, H. B.; *J. Phys. Chem.* 1990, 94, 5523.
